# Supplementary material for: Laterally stretched polycyclic aromatic hydrocarbons: synthesis of dibenzophenanthroheptaphene and tetrabenzotriphenylenopyranthrene derivatives
Source: Royal Society of Chemistry journal article supplement (doi:10.1039/c7nj00371d), 2017-01-01
Supplement: c7nj00371d1.pdf [file c7nj00371d1.pdf]

## Supporting Information

### **Laterally Stretched Polycyclic Aromatic Hydrocarbons: Synthesis of Dibenzophenanthroheptaphene and Tetrabenzotriphenyleno-pyranthrene Derivatives.**

Bassam Alameddine,<sup>\*,†</sup> Rajamohanan Sobhana Anju,<sup>†</sup> Suchetha Shetty,<sup>†</sup> Noorullah Baig,<sup>†</sup> Fakhreia Al-Sagheer,<sup>‡</sup> Saleh Al-Mousawi,<sup>‡</sup> Titus Andreas Jenny<sup>§</sup>

<sup>†</sup>Department of Mathematics and Natural Sciences, Gulf University for Science and Technology, Kuwait.

<sup>‡</sup>Department of Chemistry, University of Kuwait, Kuwait.

<sup>§</sup>Department of Chemistry, University of Fribourg, Switzerland.

## CONTENTS

- I. Experimental details (HR-MS of 1a-c, 2a-b, 4a-c, 9 and 10a,b and  $^1\text{H}$ -NMR of 1c, 2b, 4a-c, 9, 10a-b, 13a,b).
- II. UV-Emission spectra of 9.
- III. II. Computational Details (3D optimized structures and their HOMO-LUMO configurations).

I. Experimental details MALDI 1a-c, 2a-b, 4a-c, 9 and 10a,b.

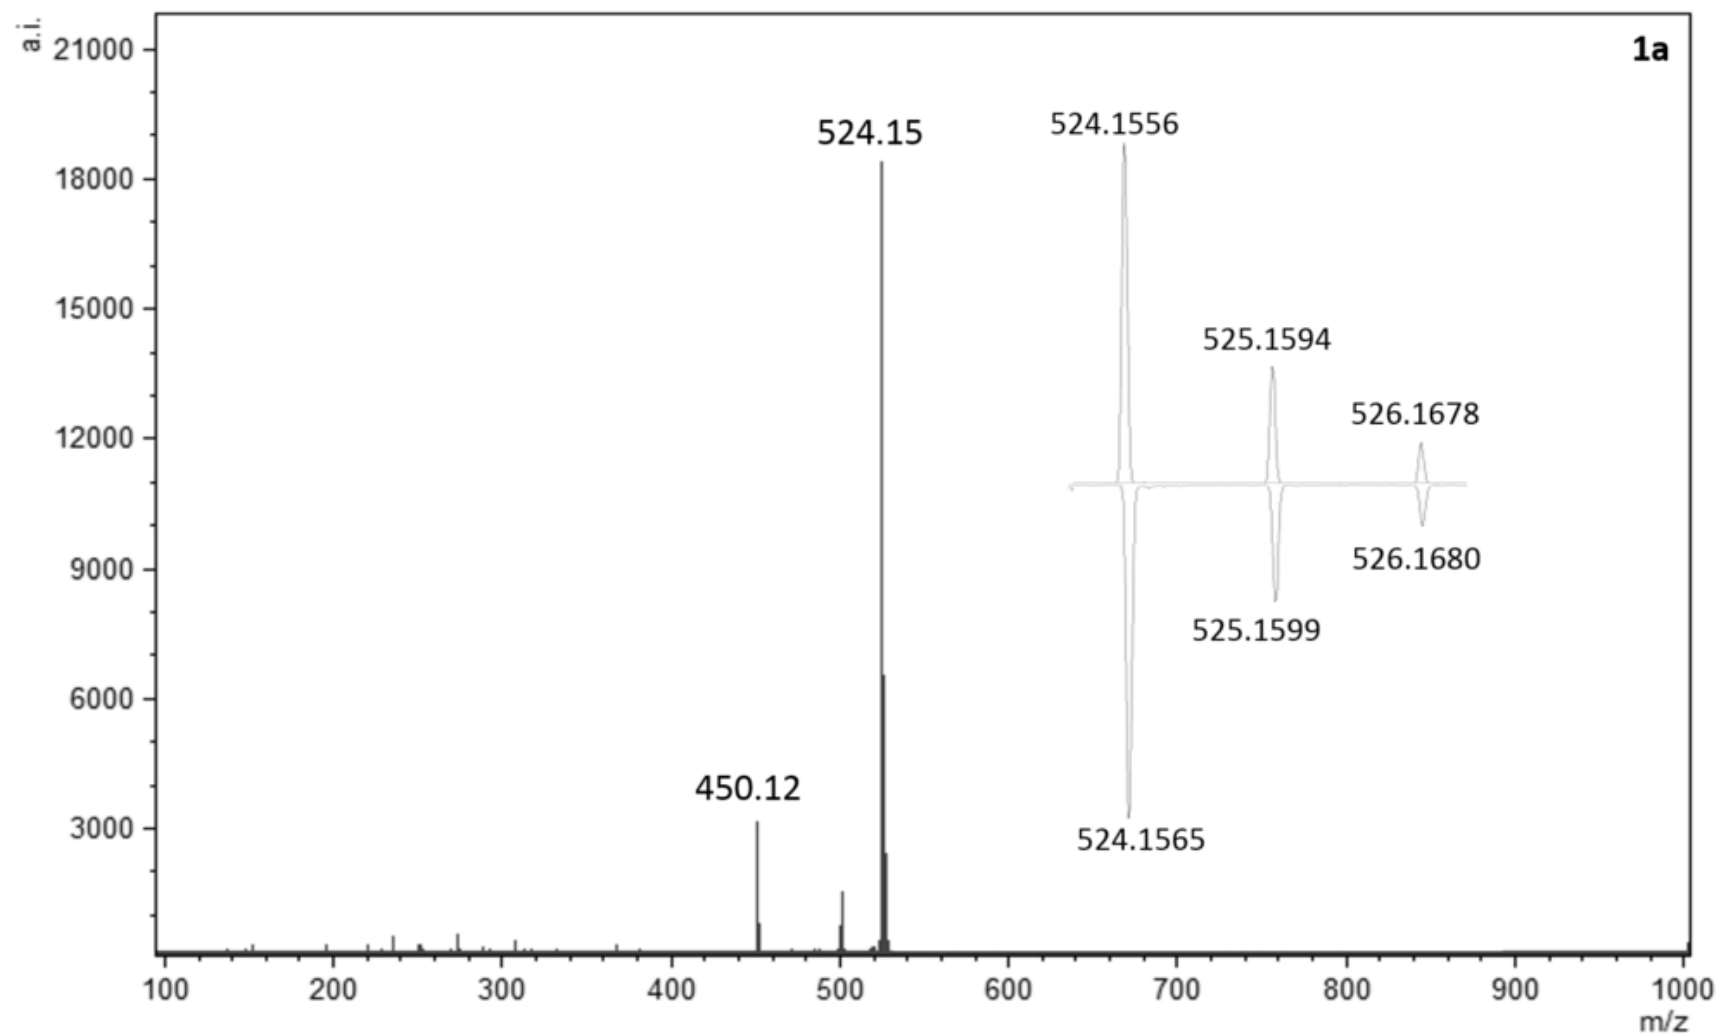

Figure S1. HR-MALDI spectrum of **1a**

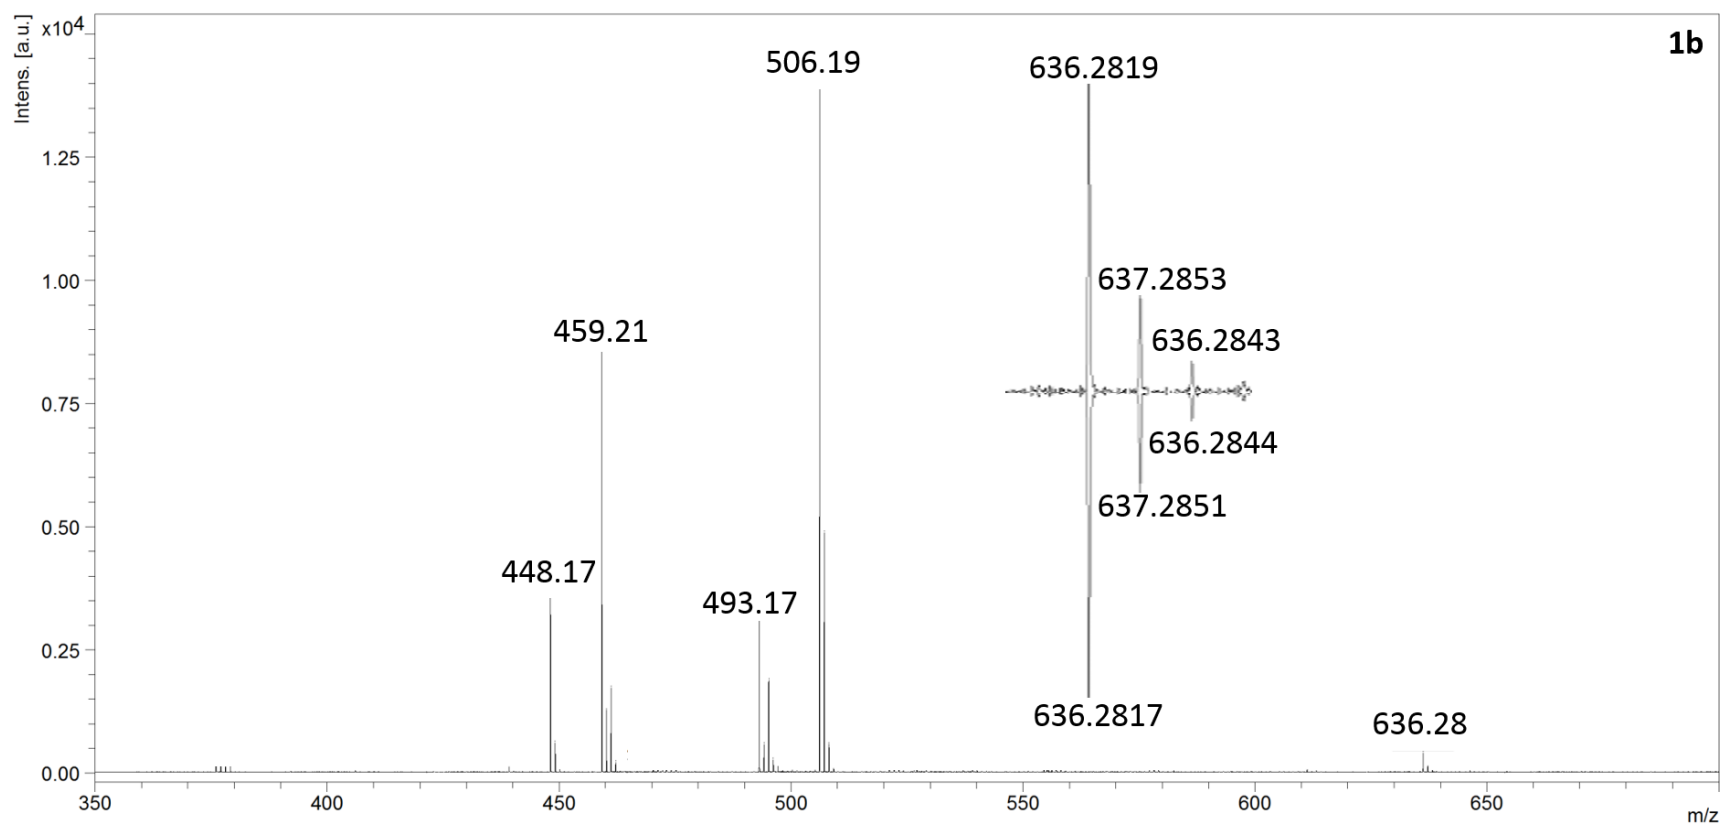

**Figure S2.** HR-MALDI spectrum of **1b**

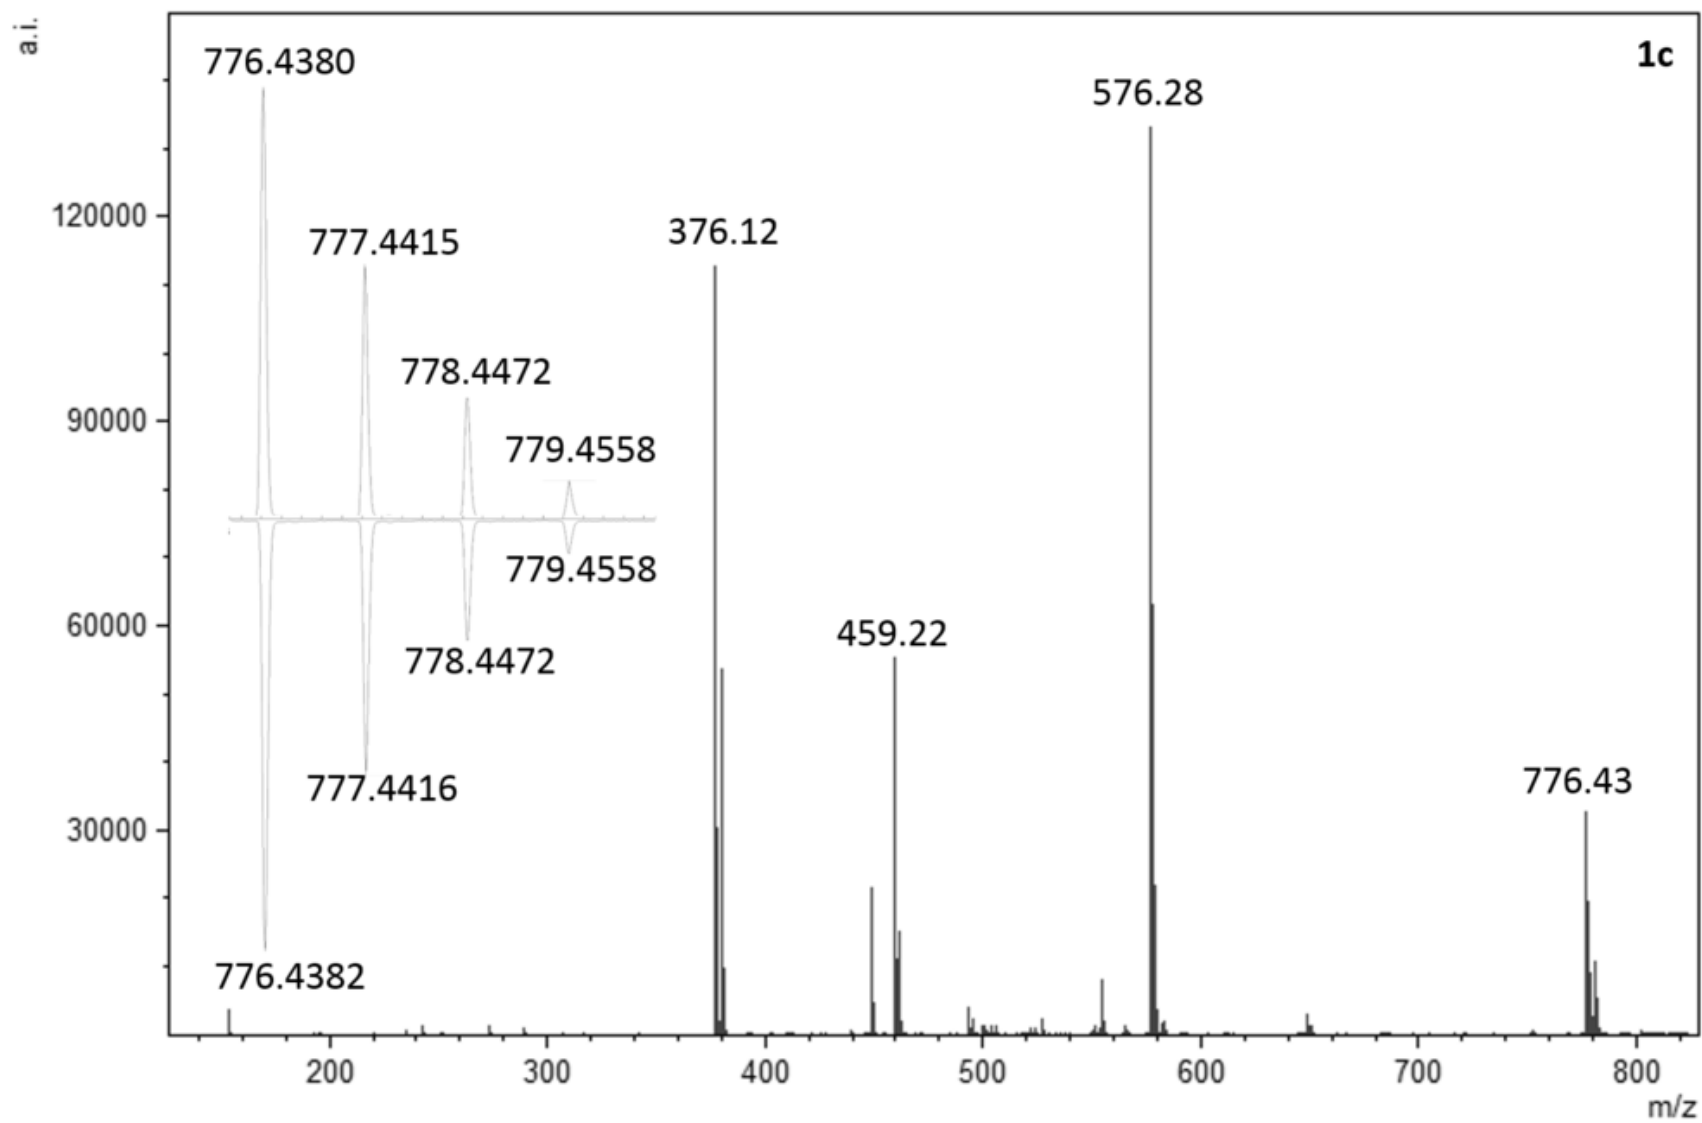

**Figure S3.** HR-MALDI spectrum of **1c**

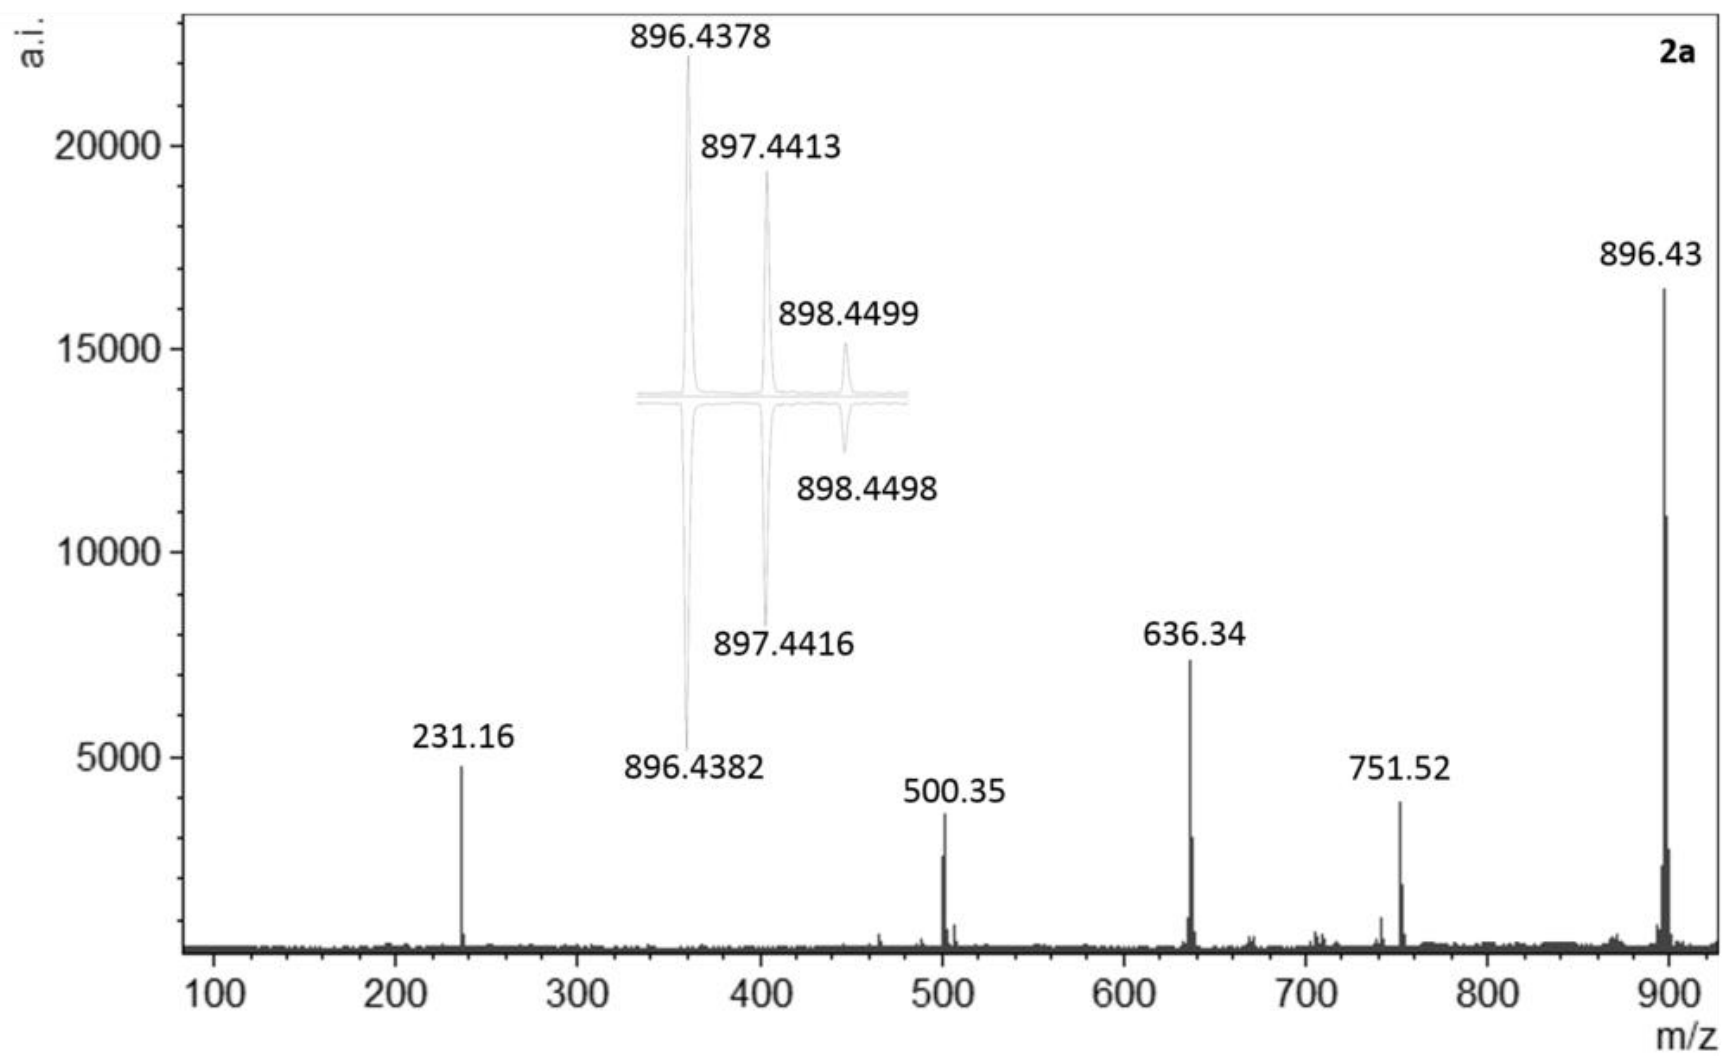

**Figure S4.** HR-MALDI spectrum of **2a**

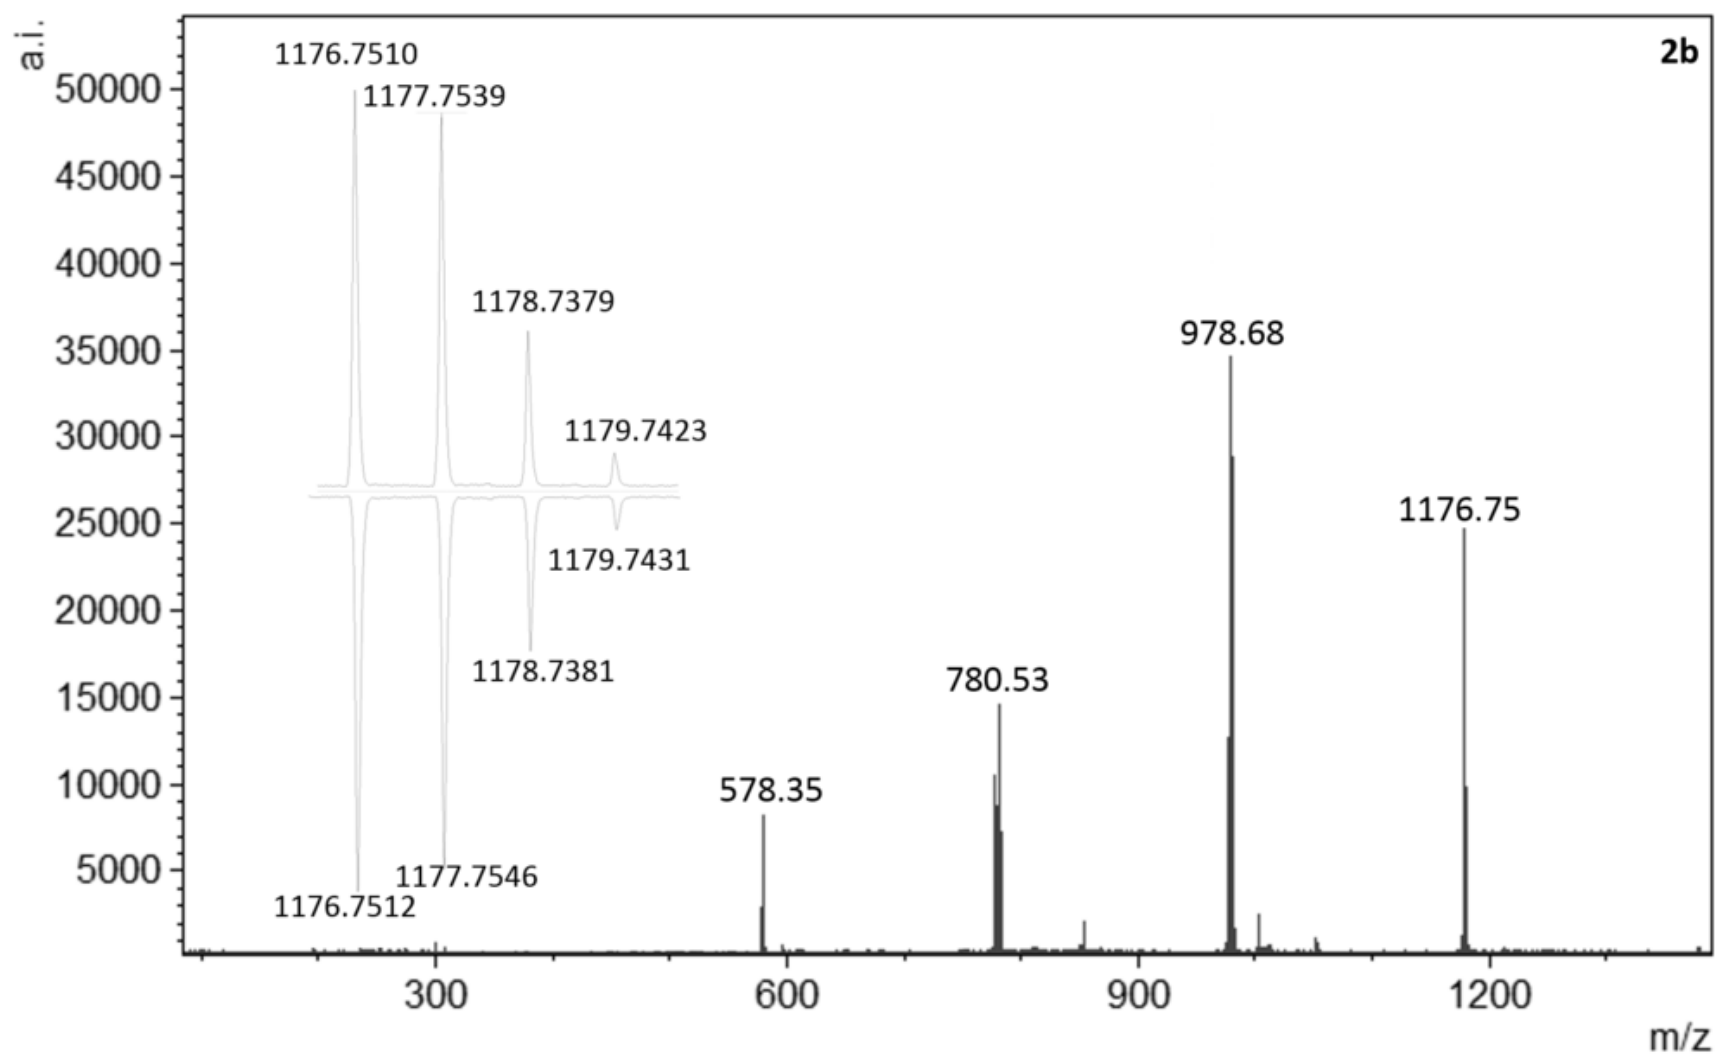

**Figure S5.** HR-MALDI spectrum of **2b**

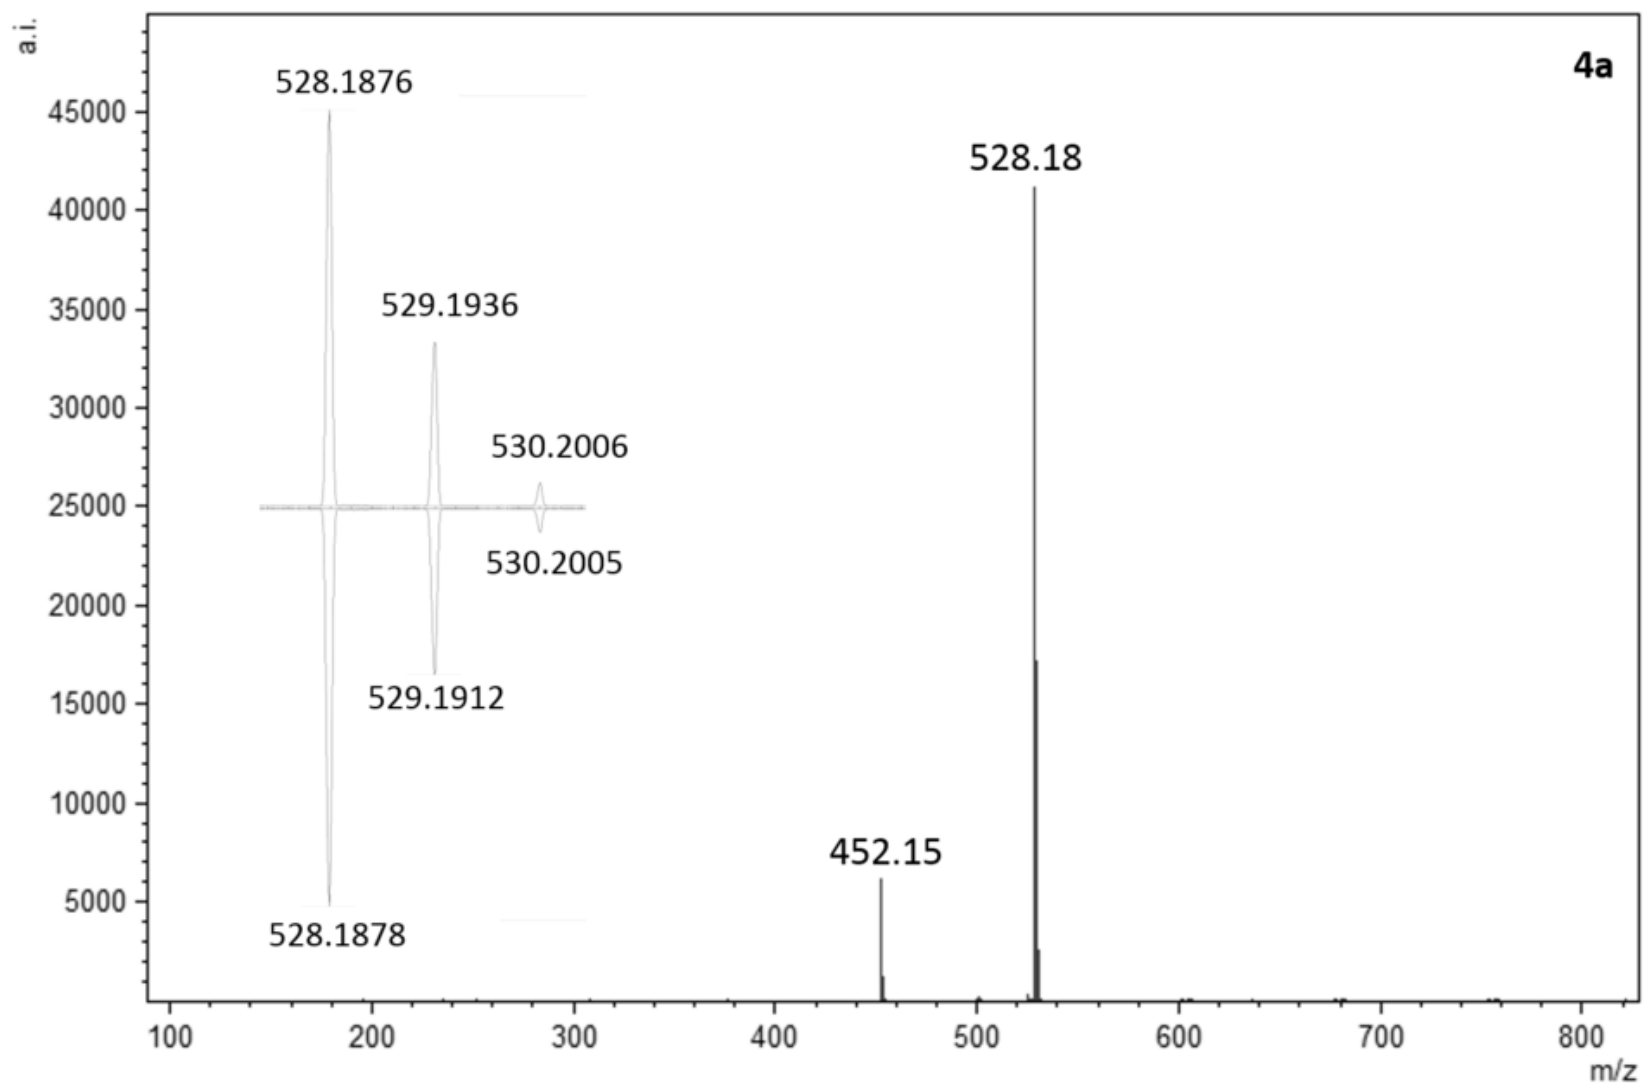

**Figure S6.** HR-MALDI spectrum of **4a**

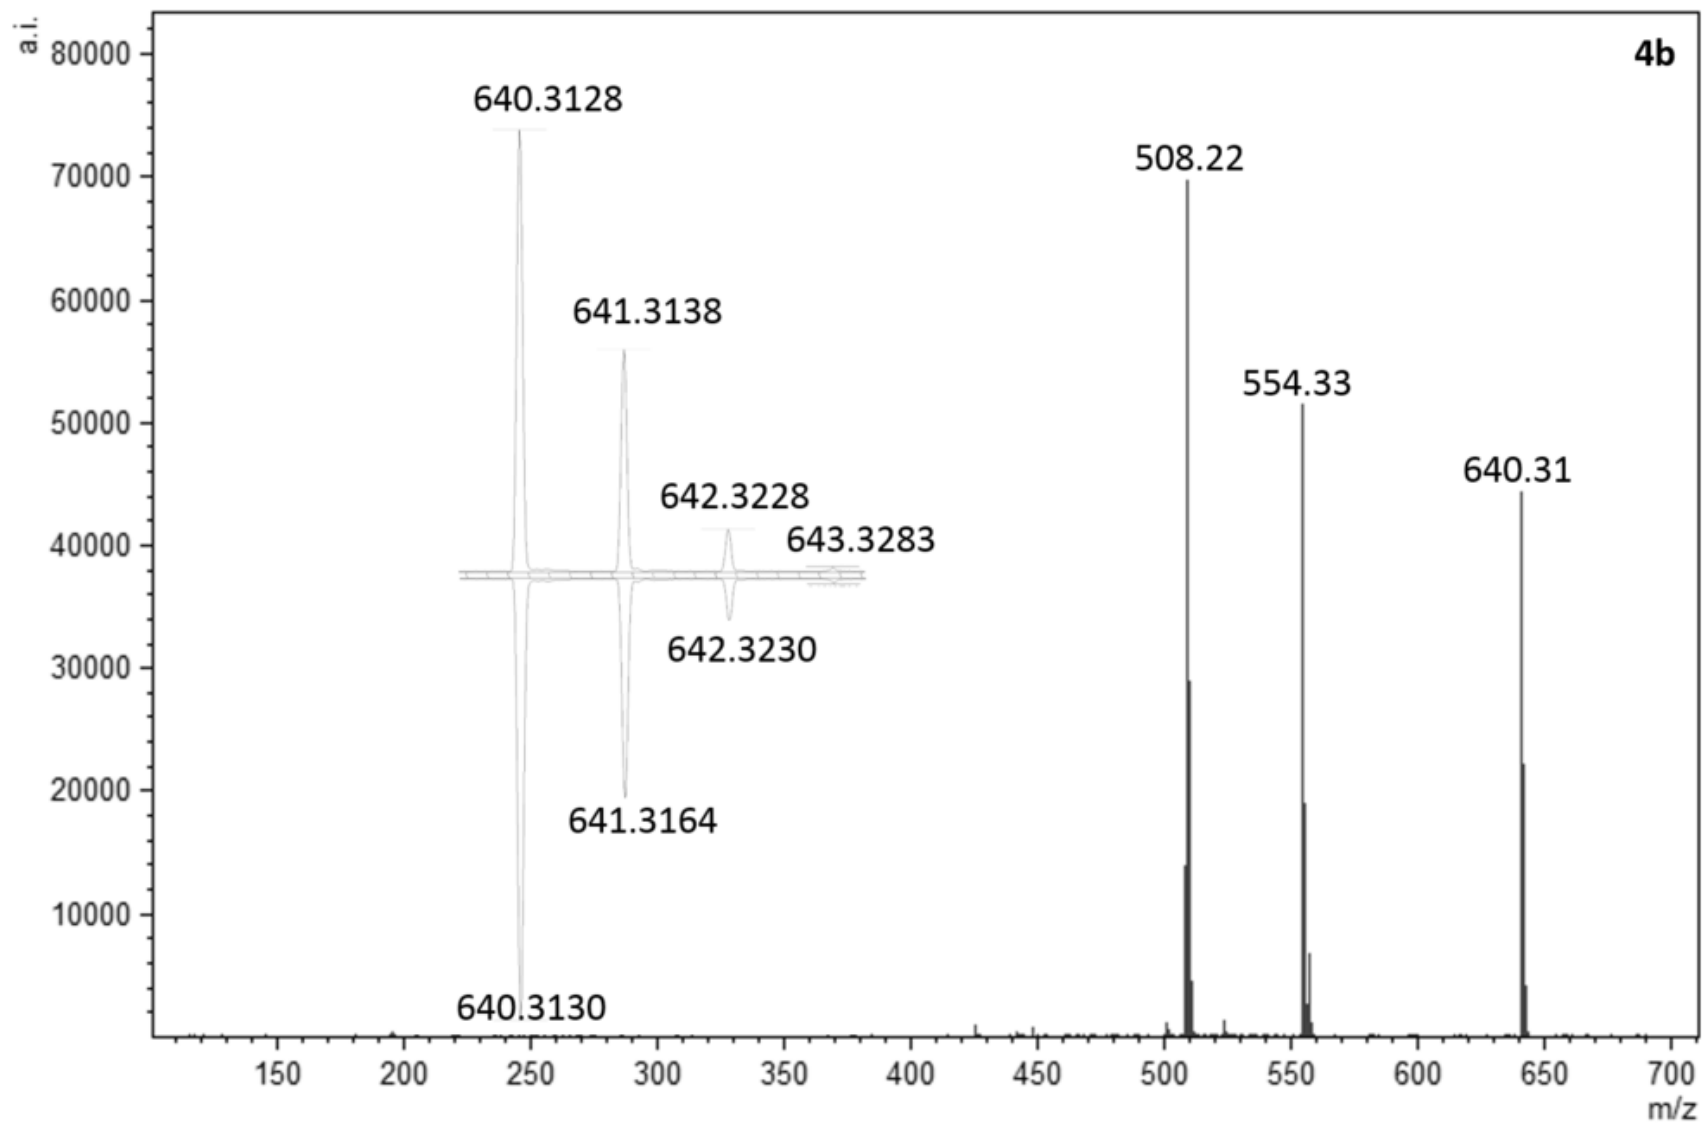

**Figure S7.** HR-MALDI spectrum of **4b**

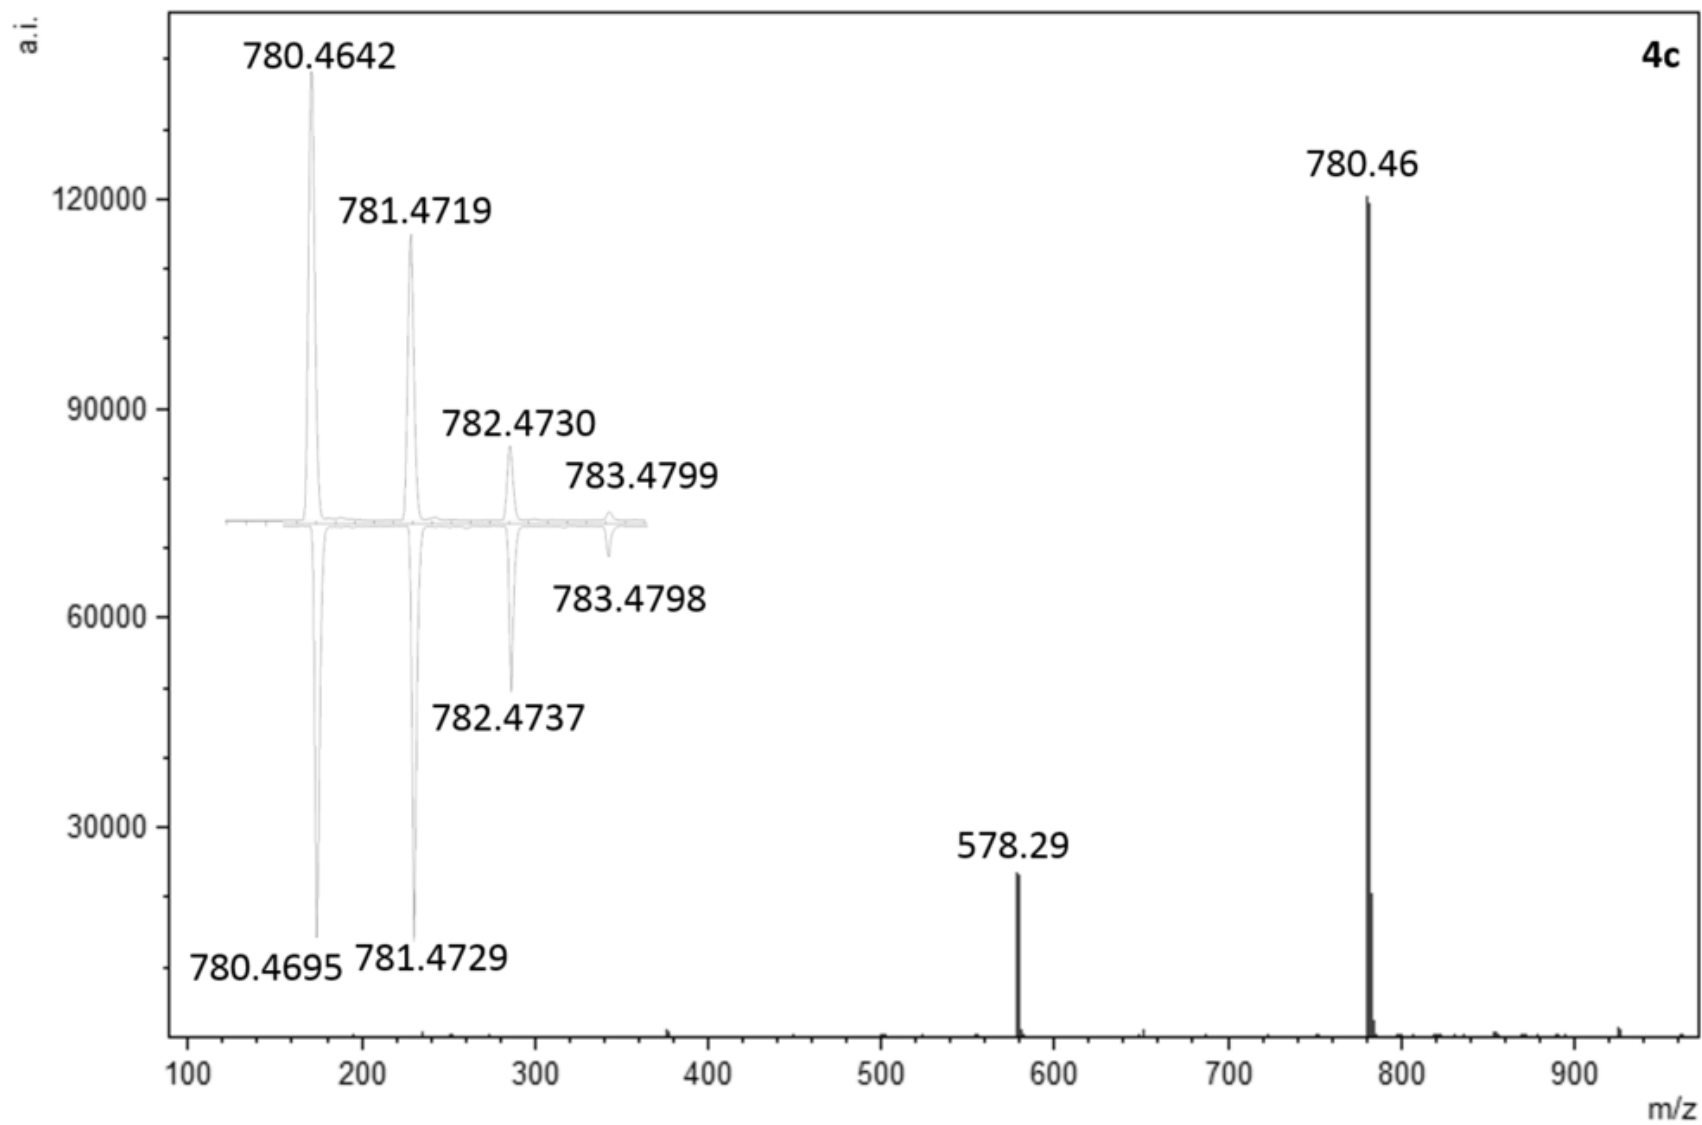

**Figure S8.** HR-MALDI spectrum of **4c**

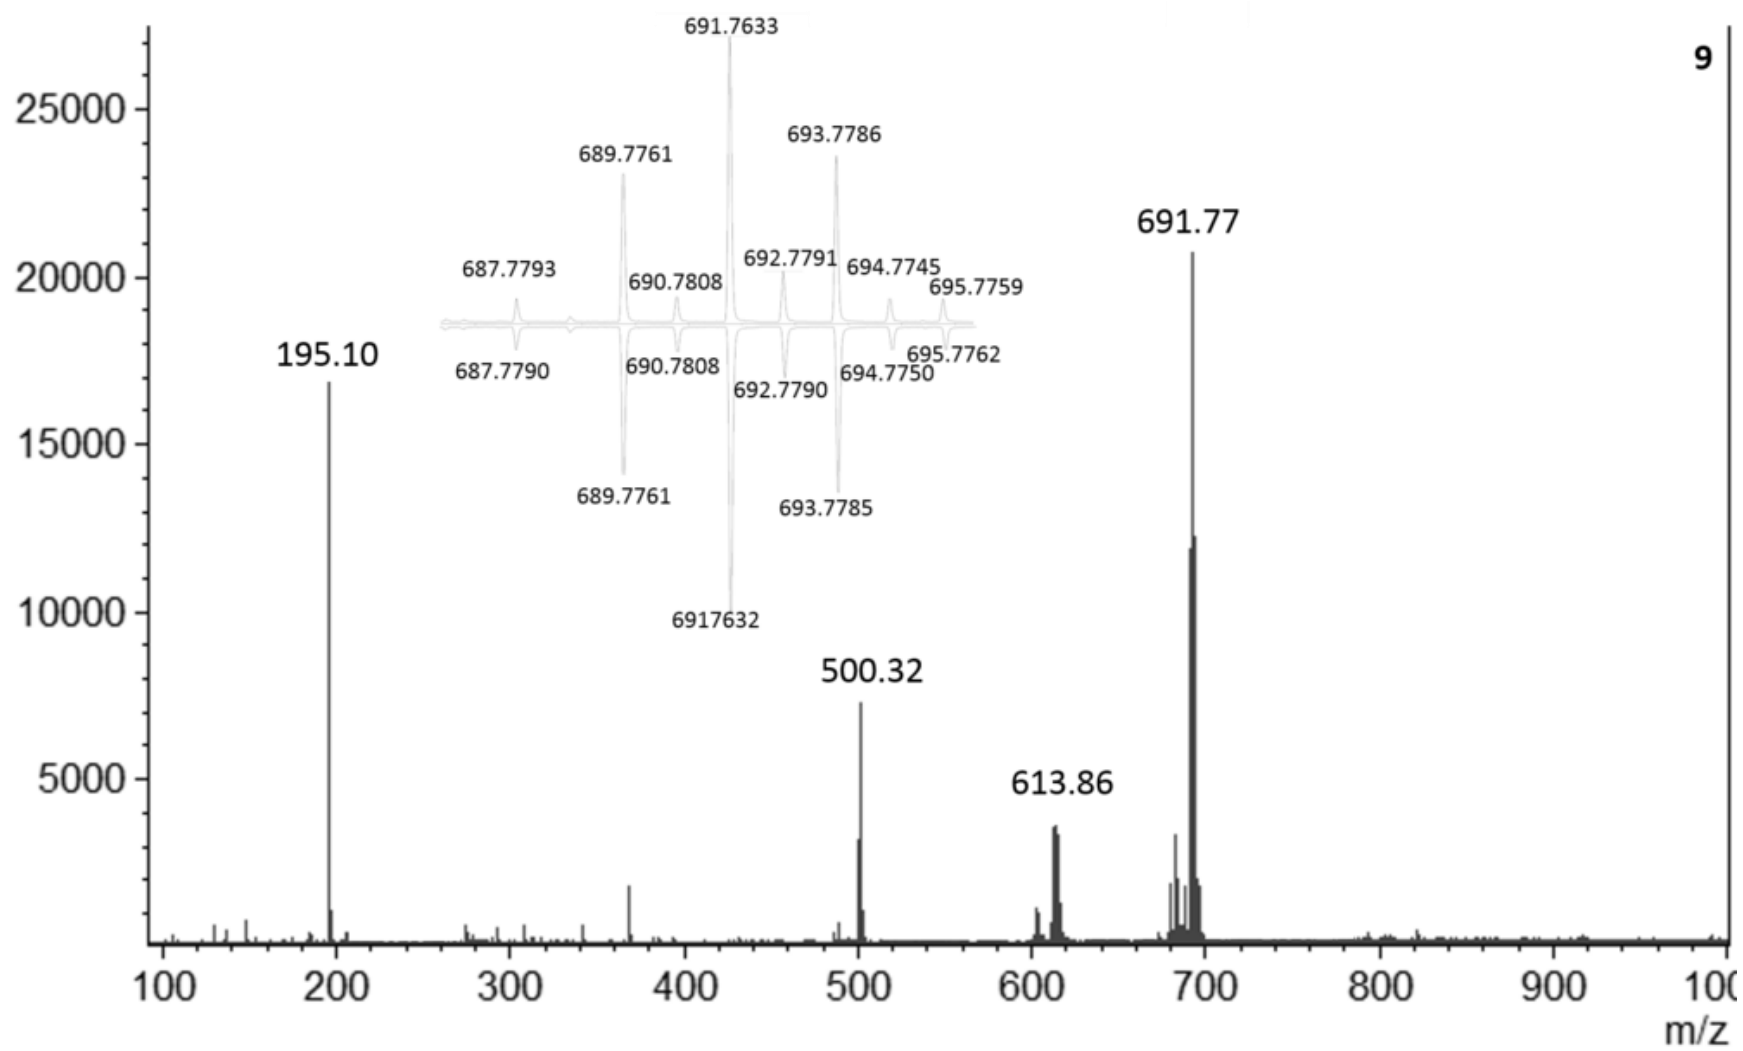

Figure S9. HR-MALDI spectrum of **9**

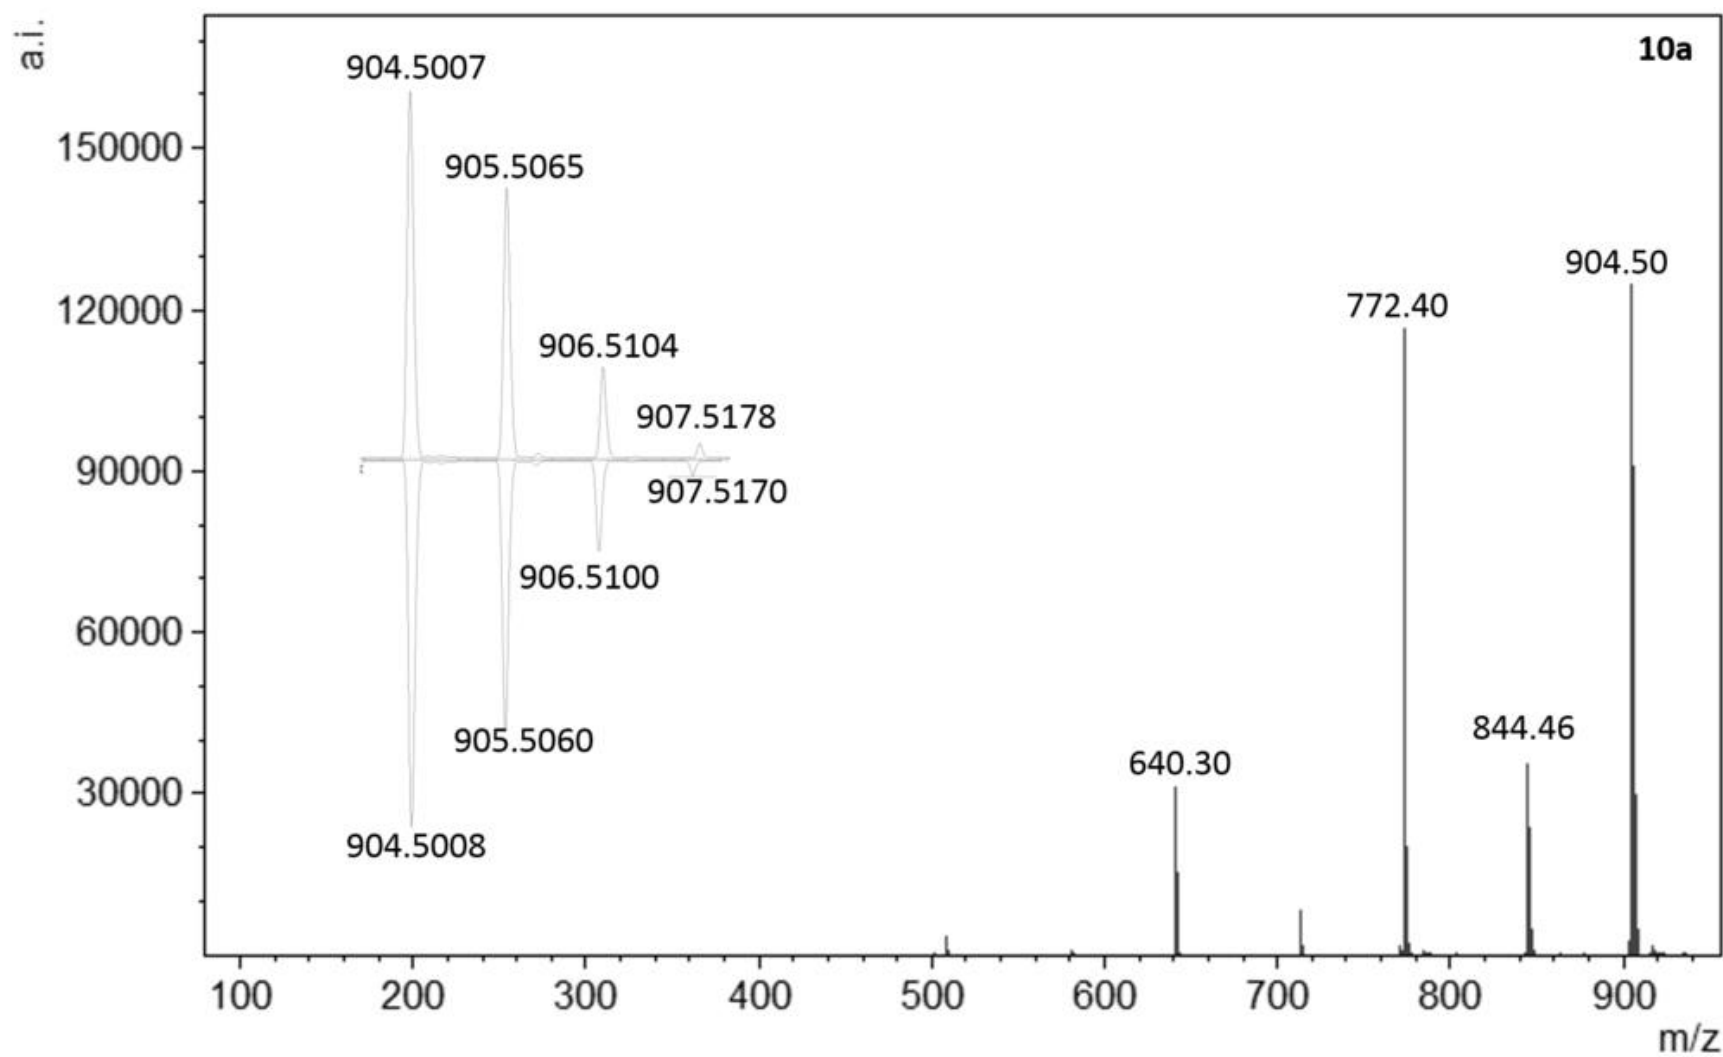

**Figure S10** HR-MALDI spectrum of **10a**

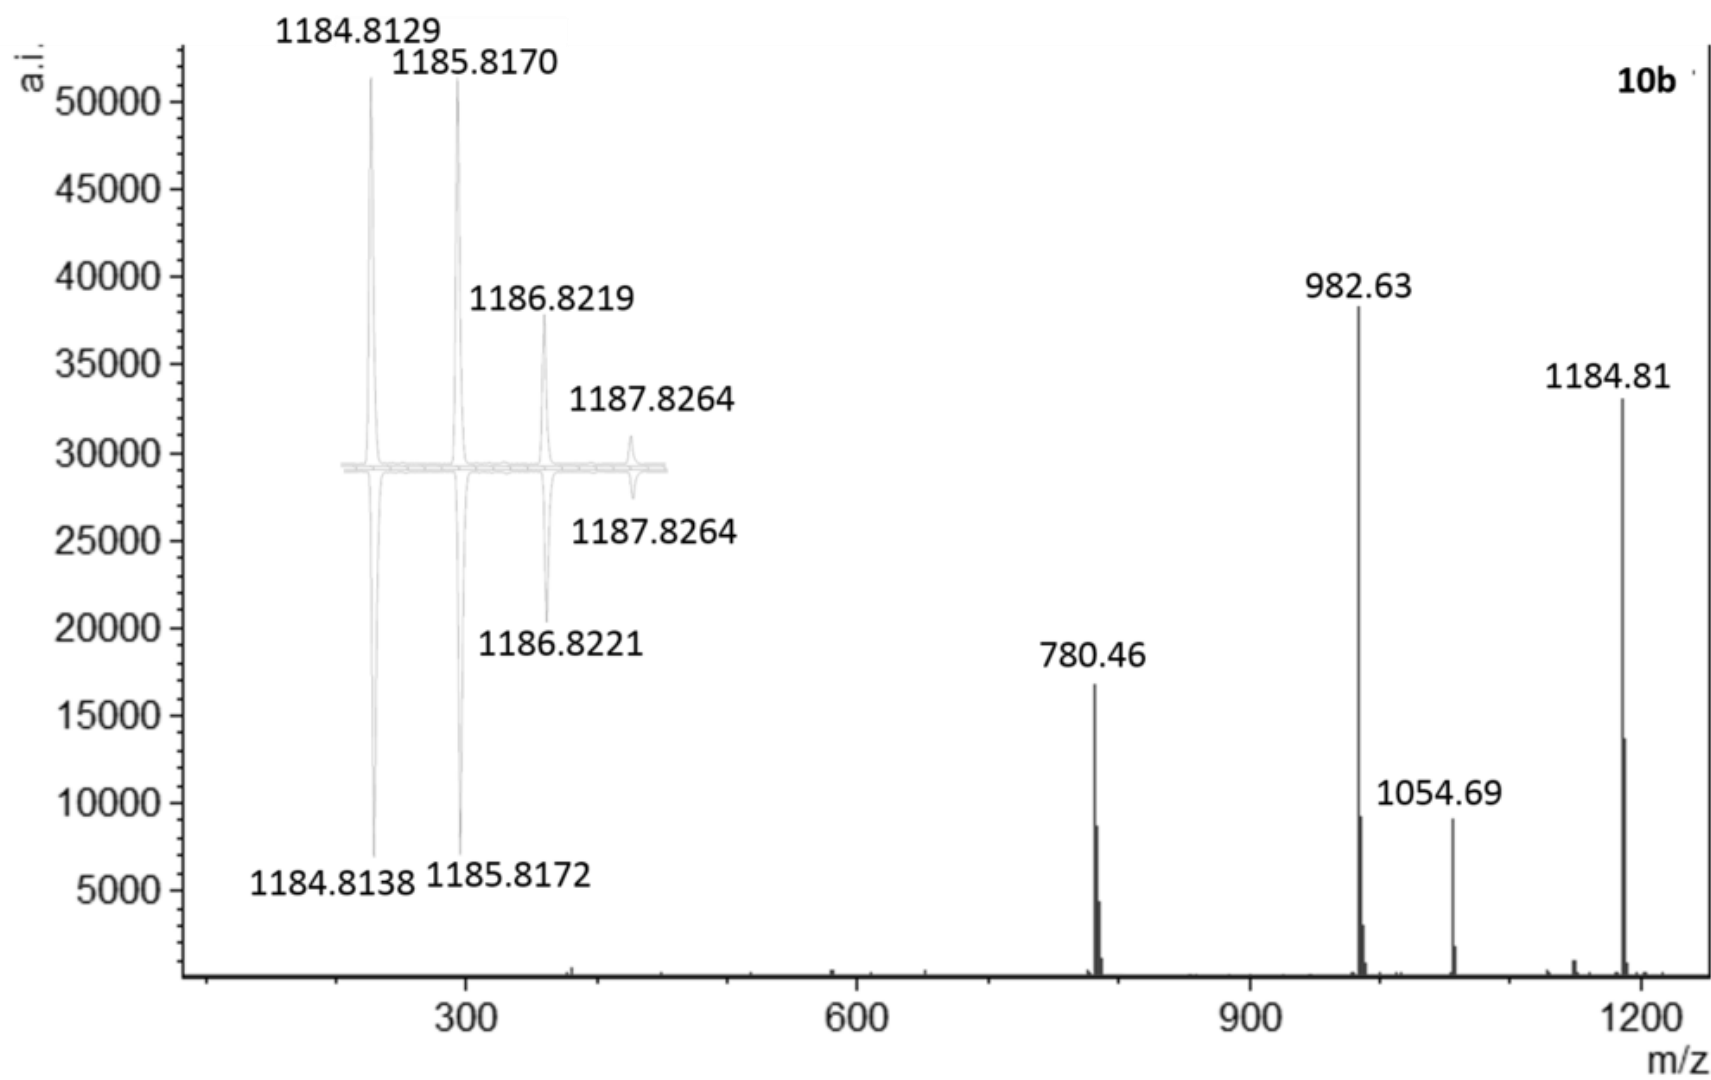

**Figure S11.** HR-MALDI spectrum of **10b**

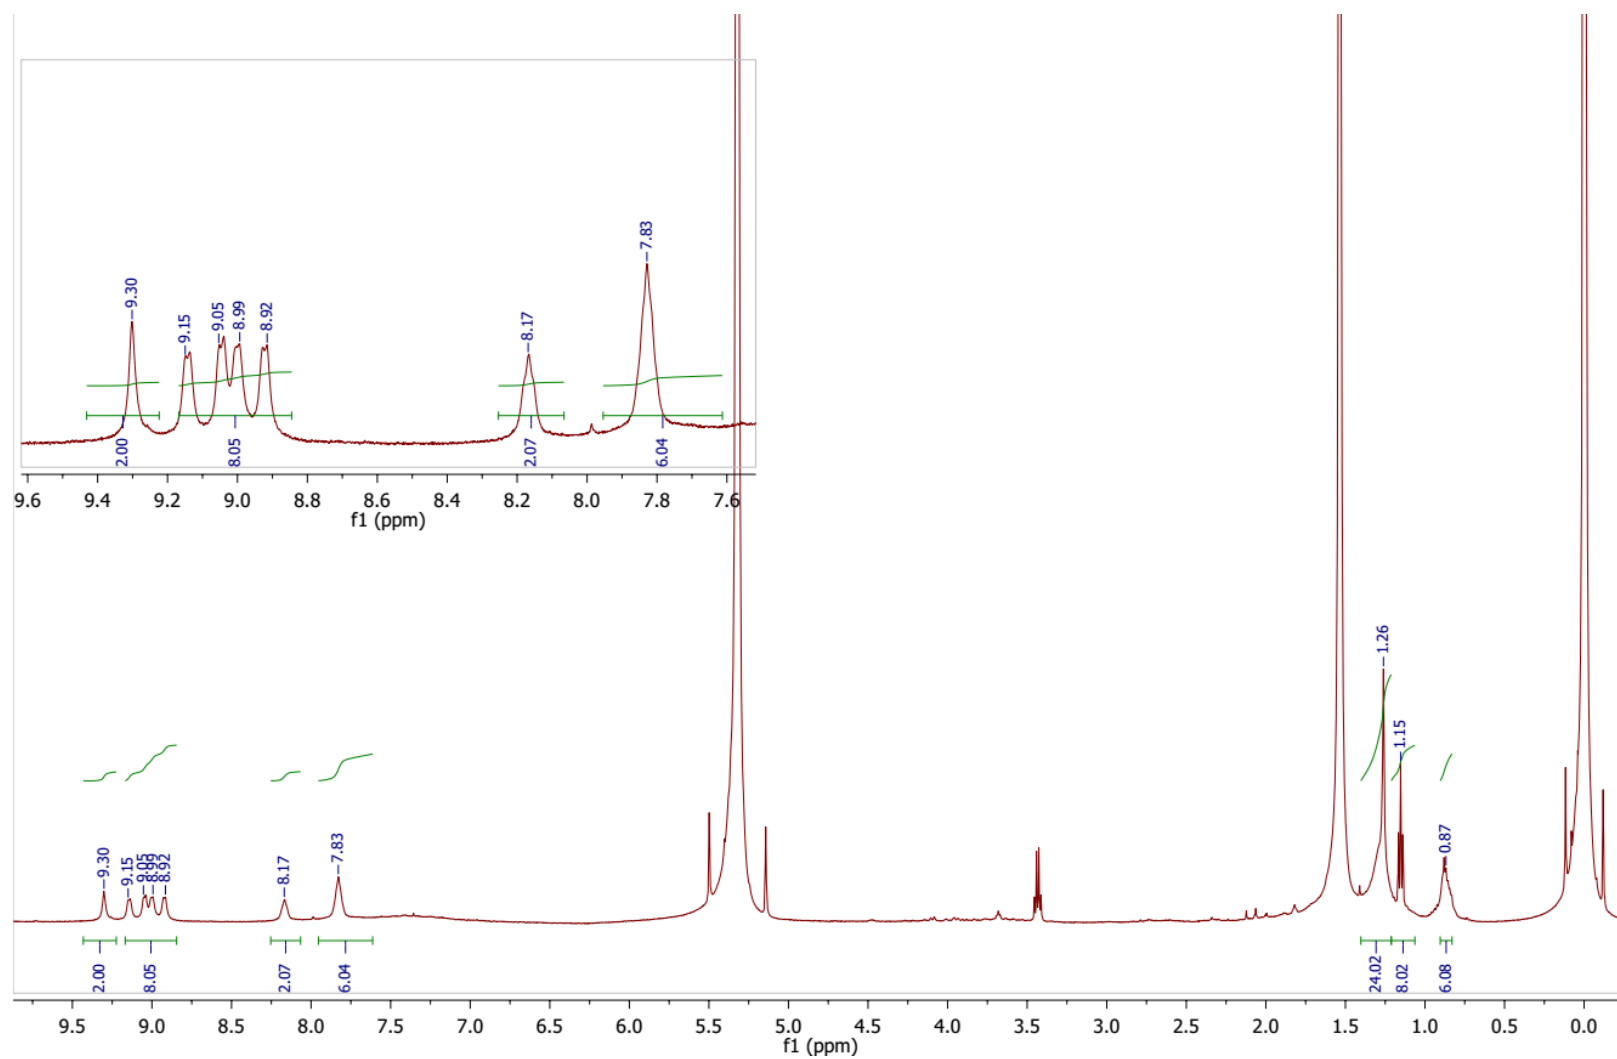

**Figure S12.**  $^1\text{H}$  NMR spectrum of **1c**

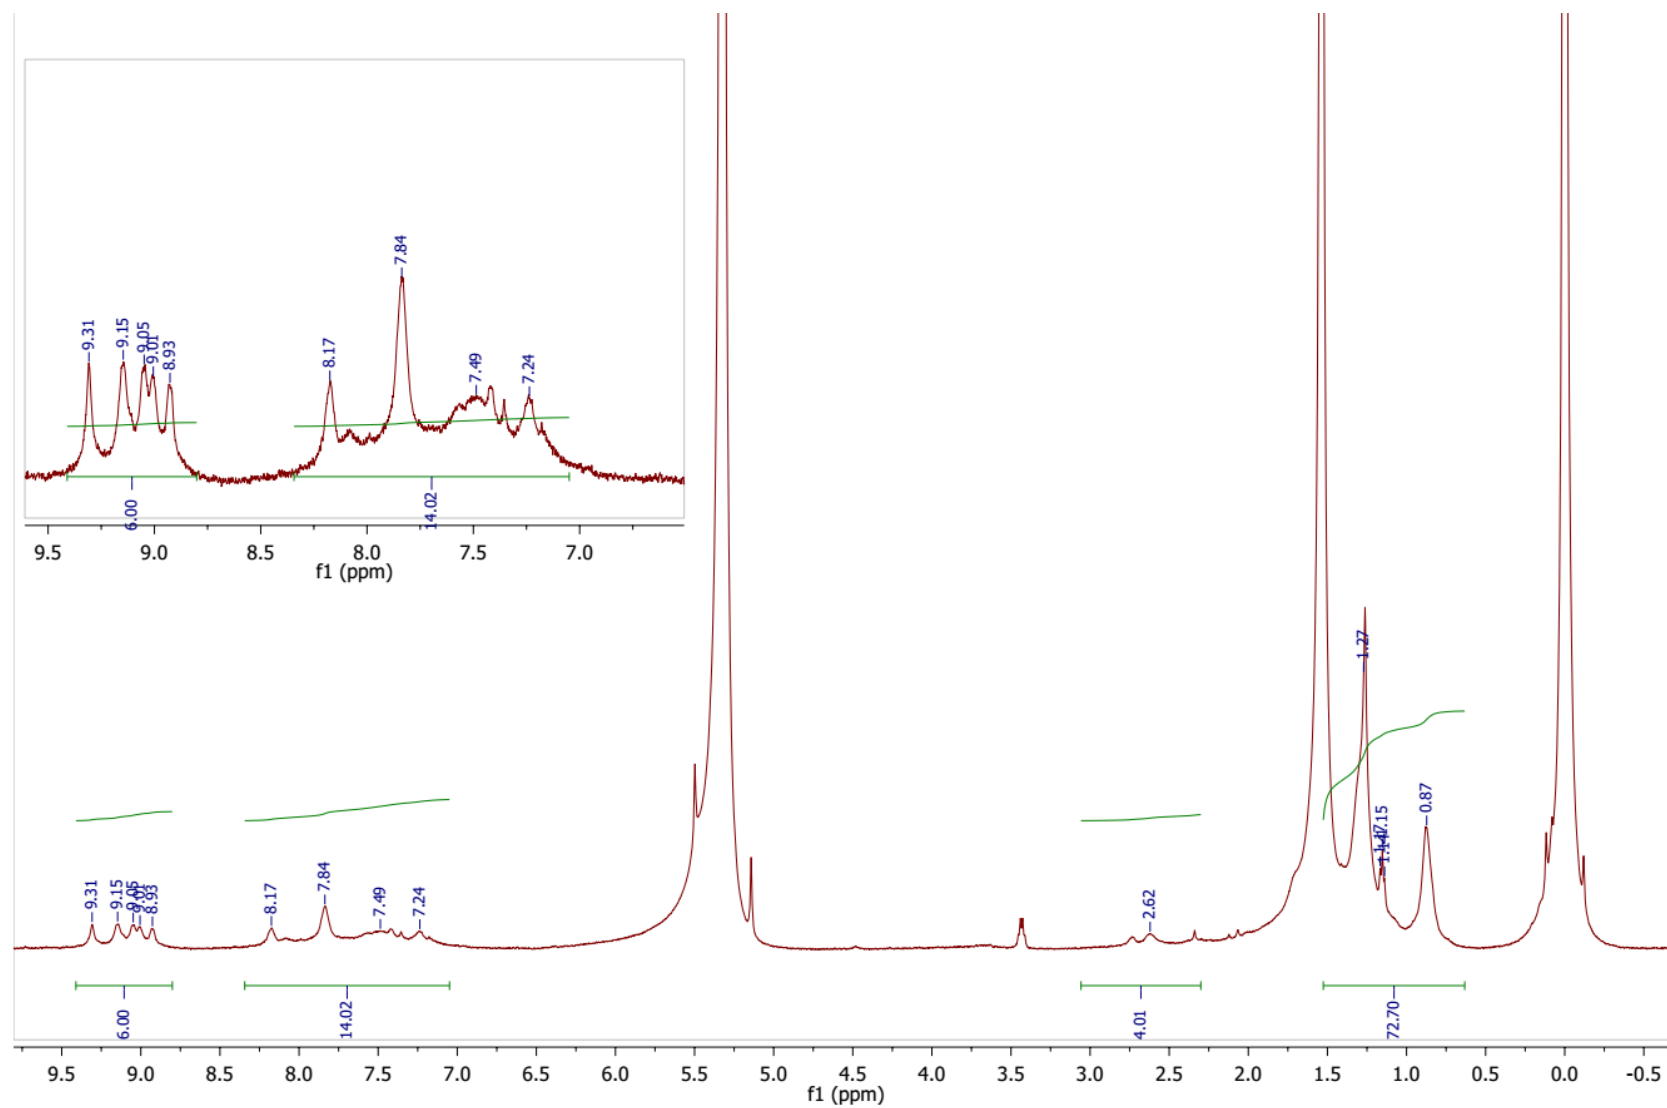

**Figure S13.**  $^1\text{H}$  NMR spectrum of **2b**

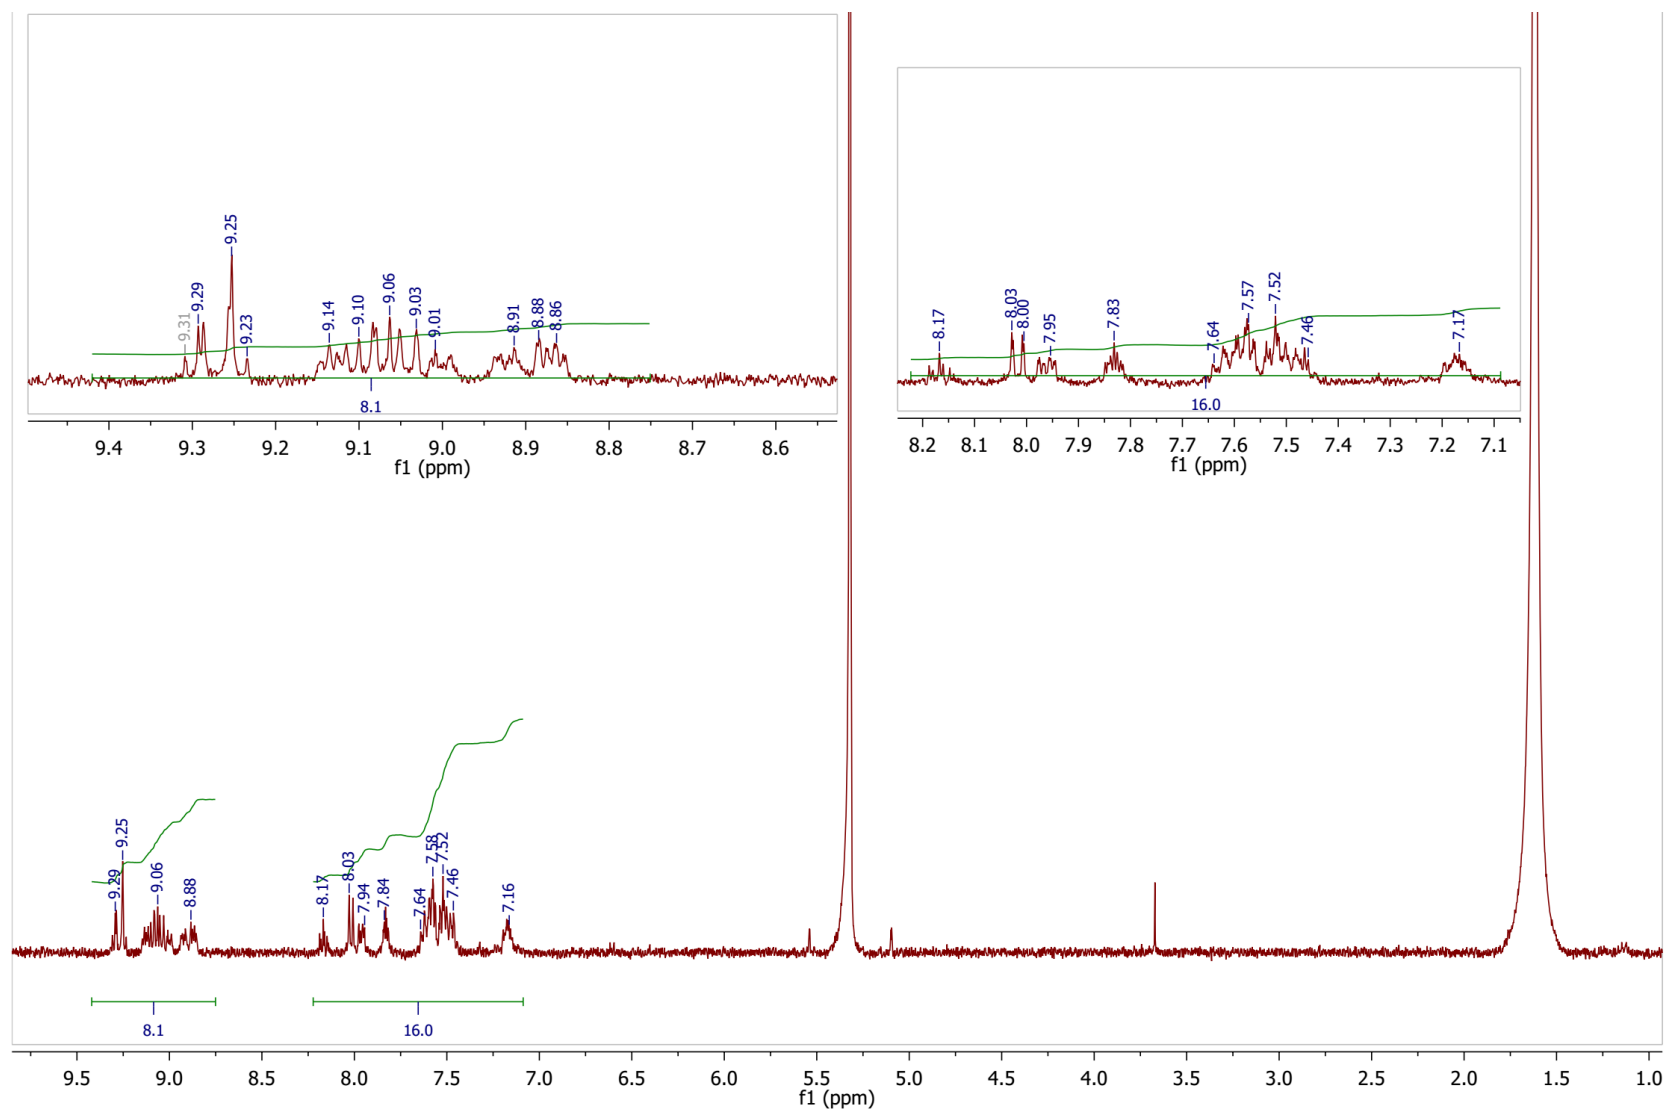

**Figure S14.** <sup>1</sup>H NMR spectrum of 4a

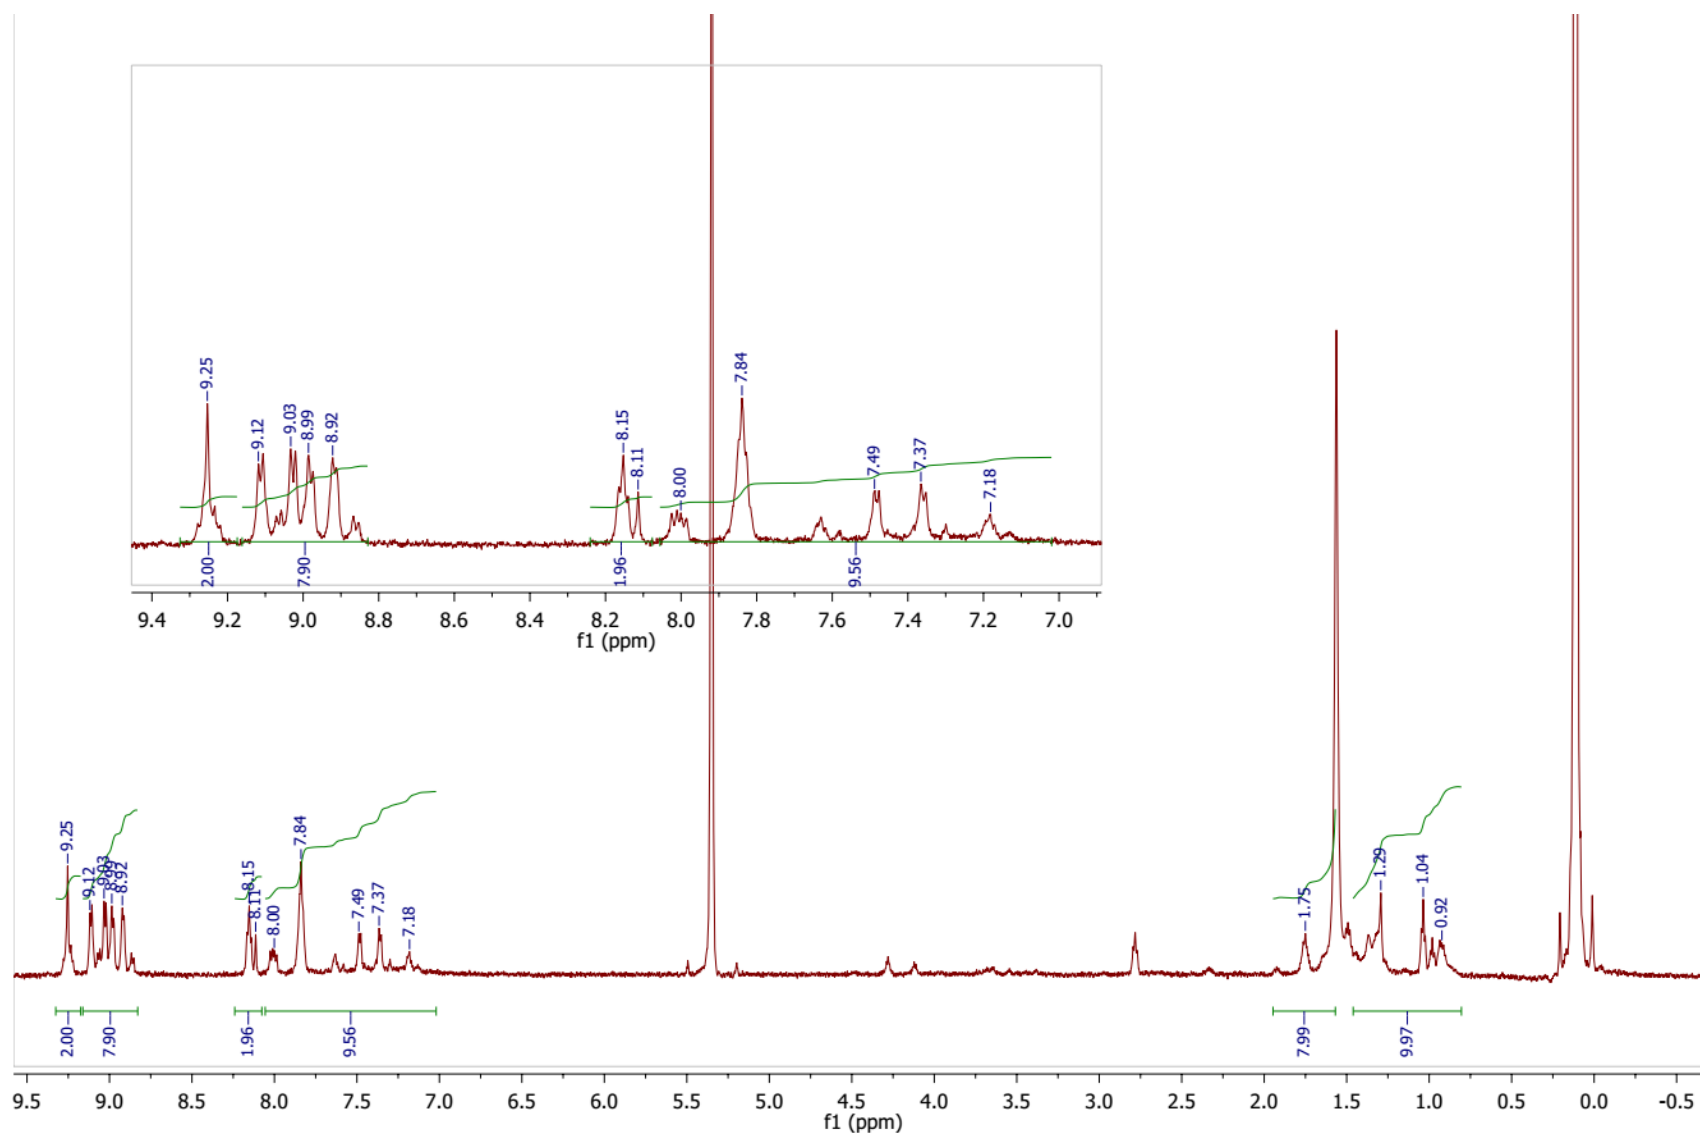

**Figure S15.**  $^1\text{H}$  NMR spectrum of **4b**

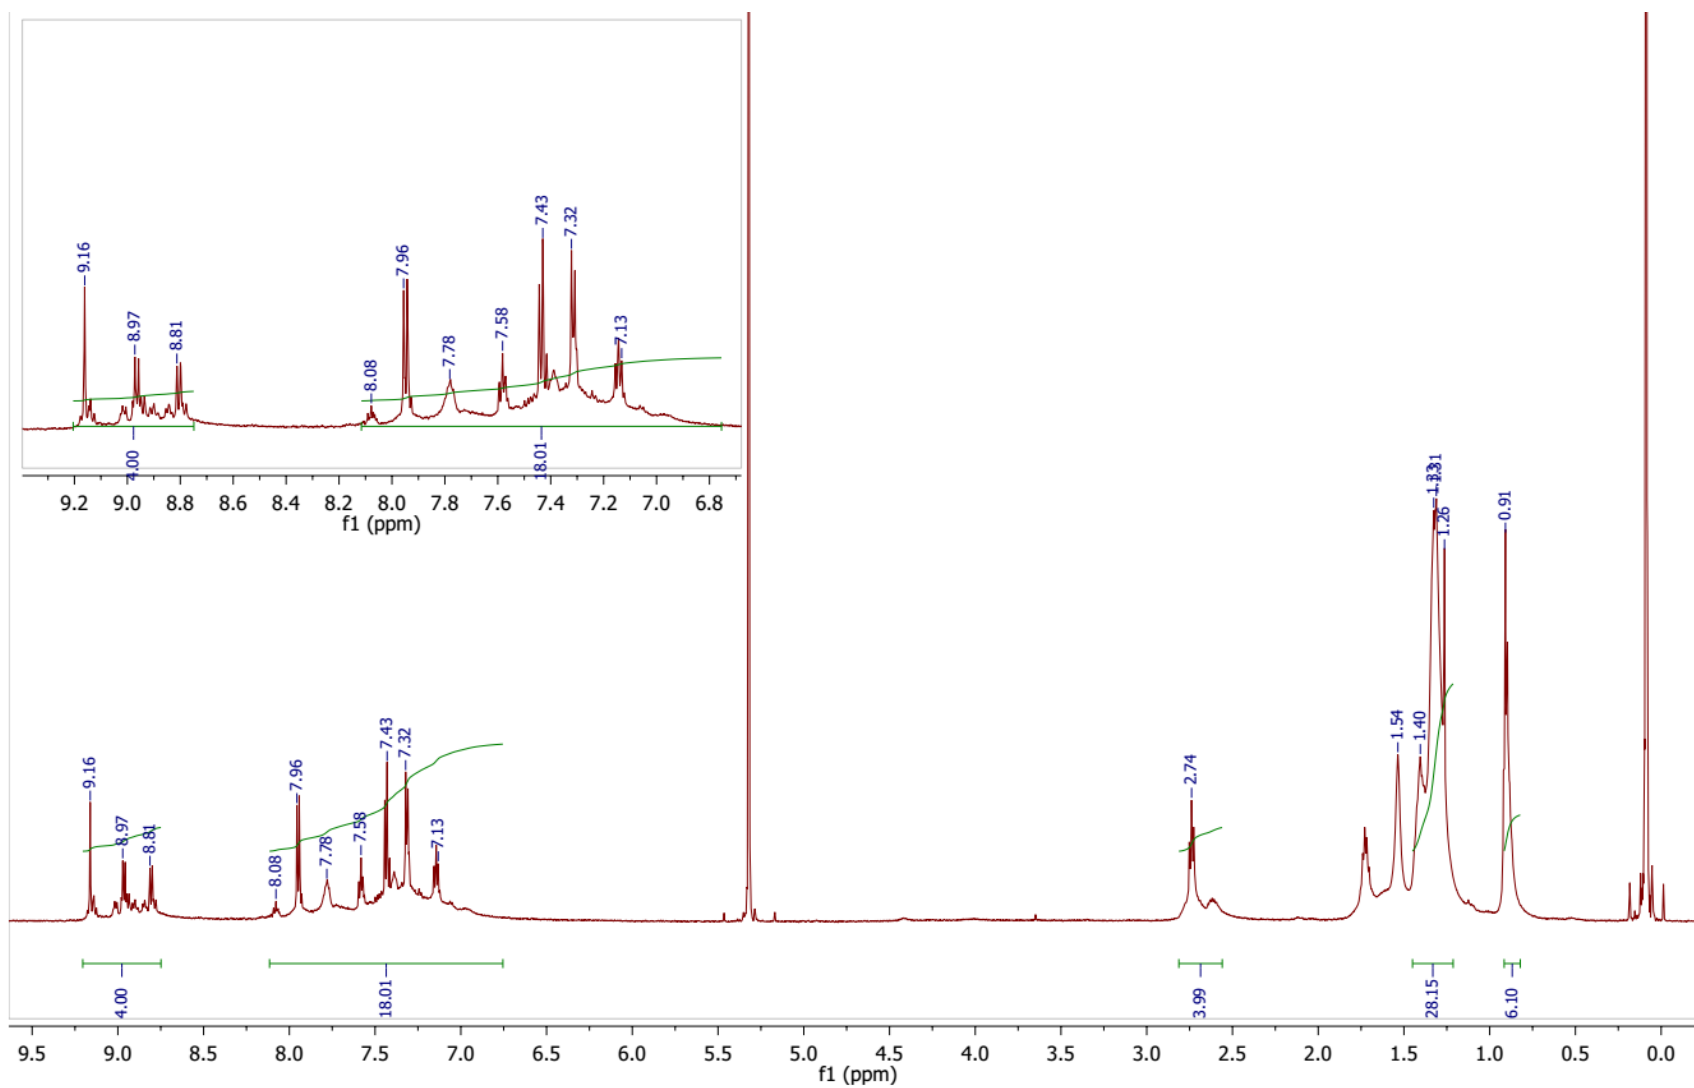

**Figure S16.** <sup>1</sup>H NMR spectrum of **4c**

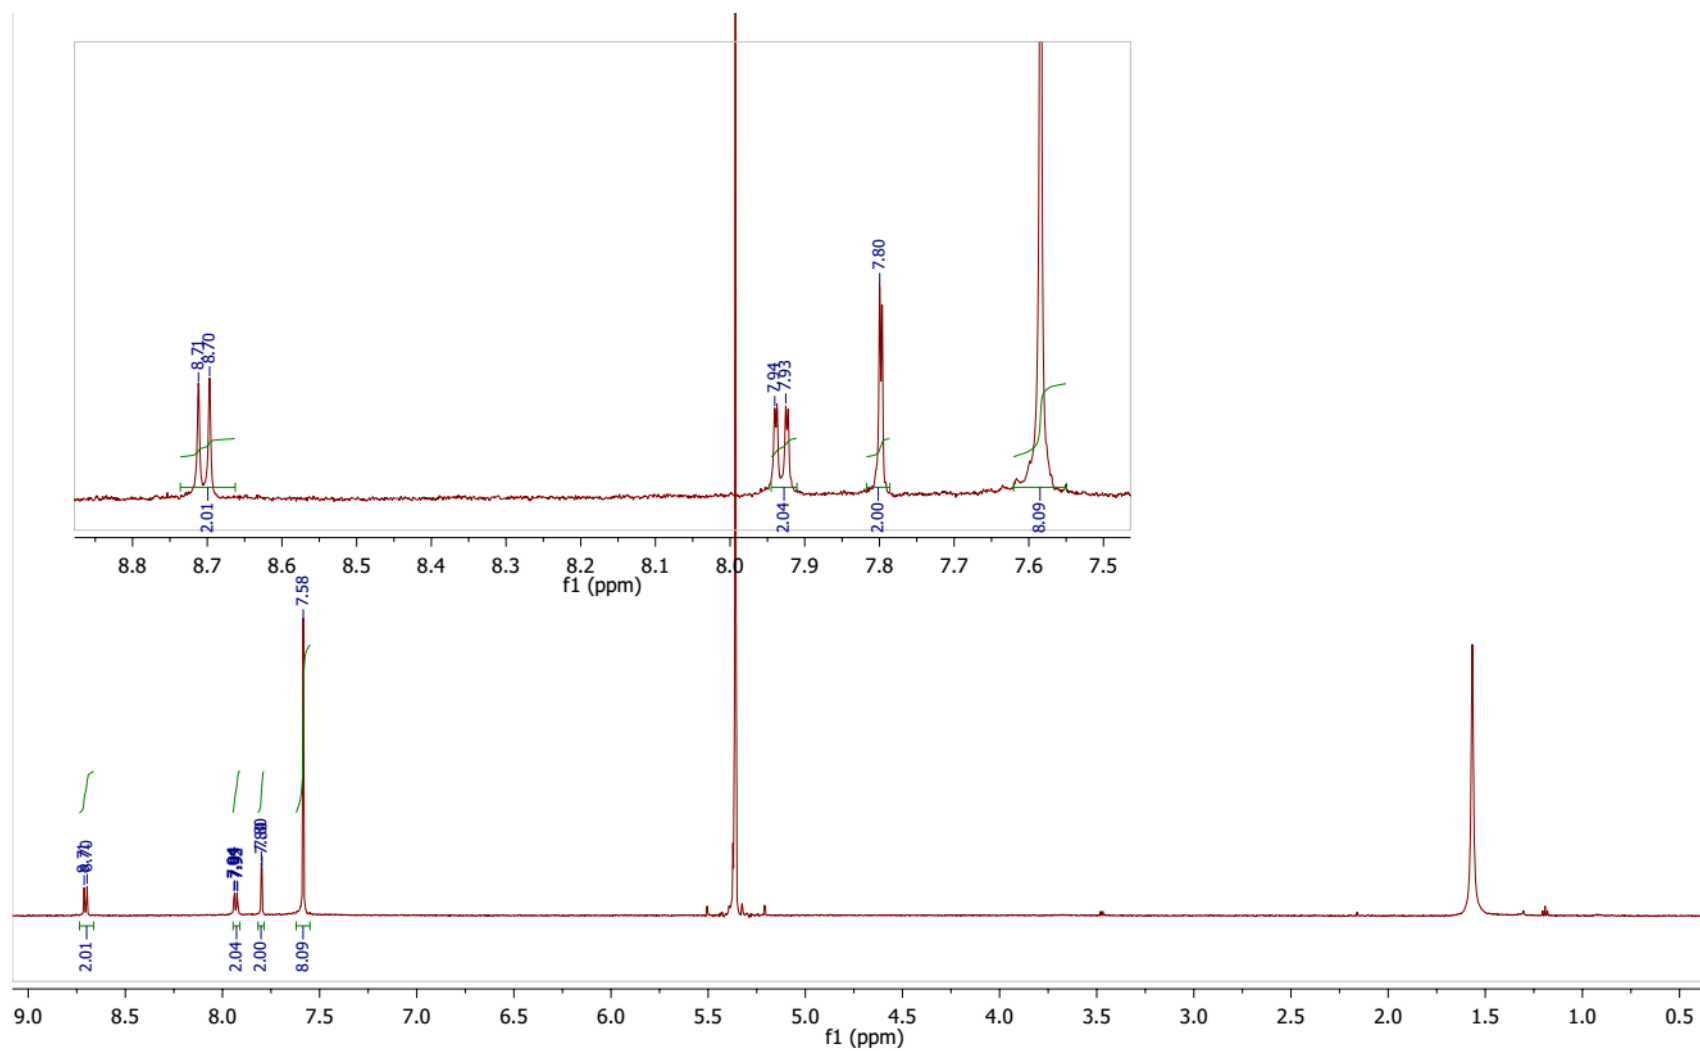

**Figure S17.**  $^1\text{H}$  NMR spectrum of **9**

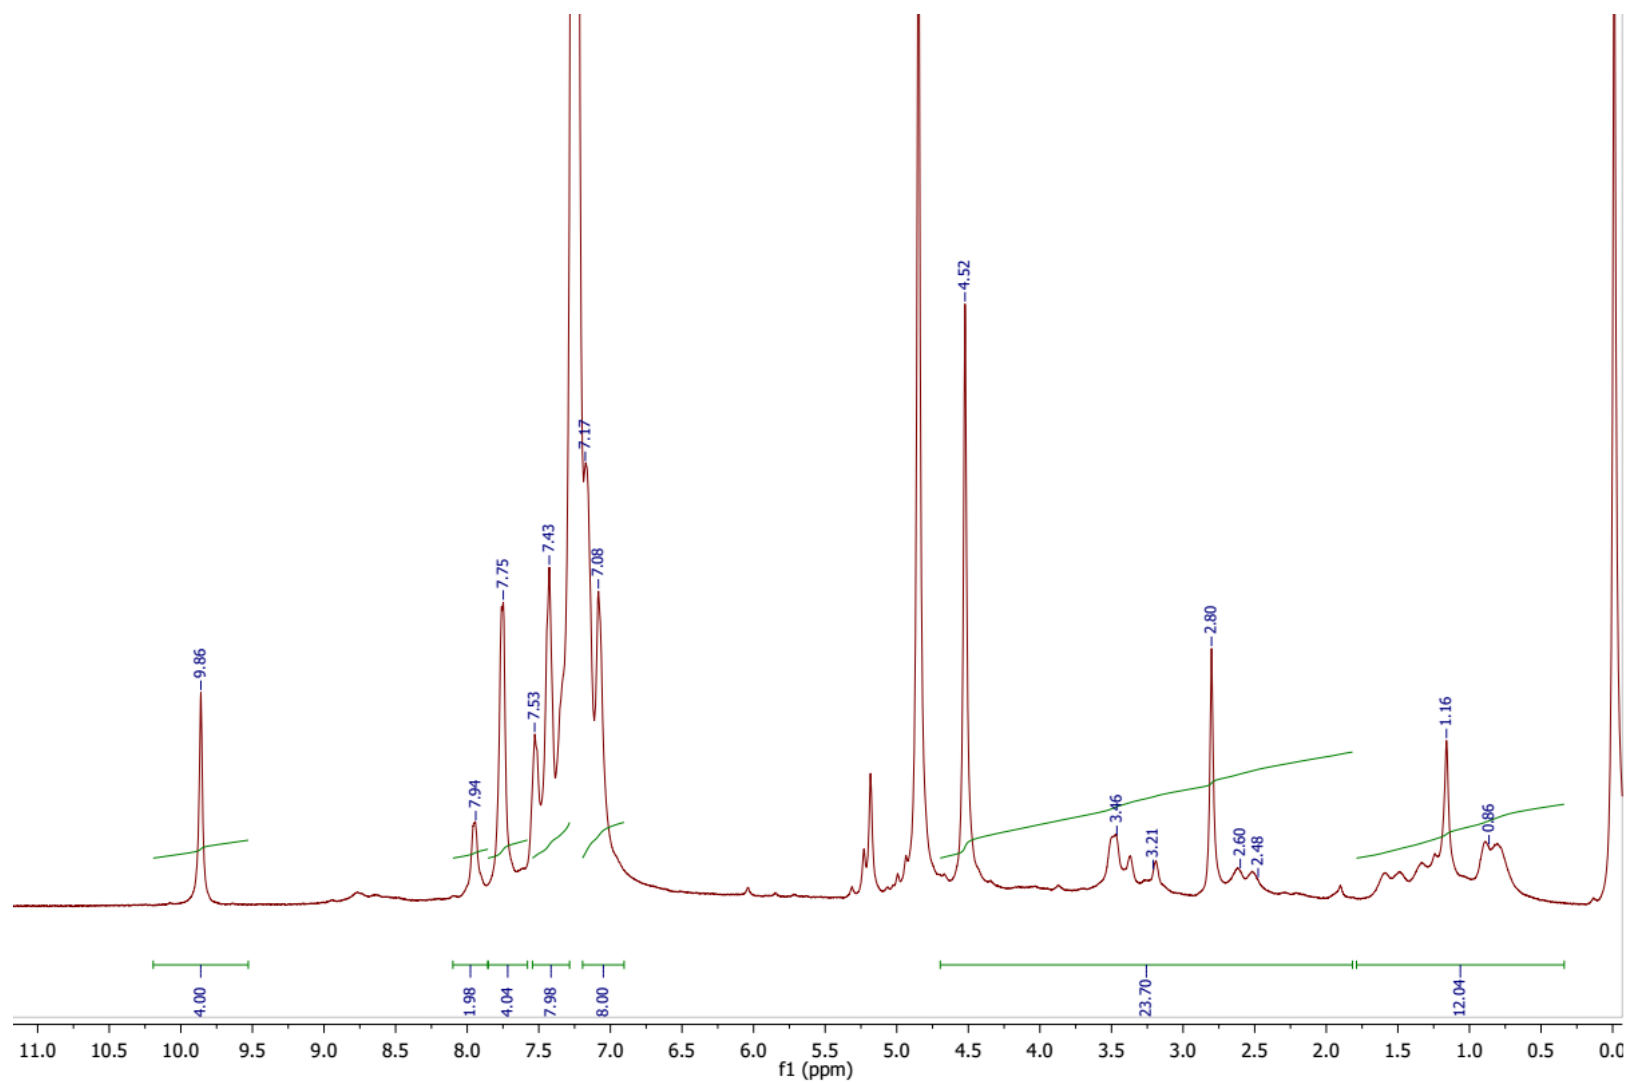

**Figure S18.** <sup>1</sup>H NMR spectrum of **10a**

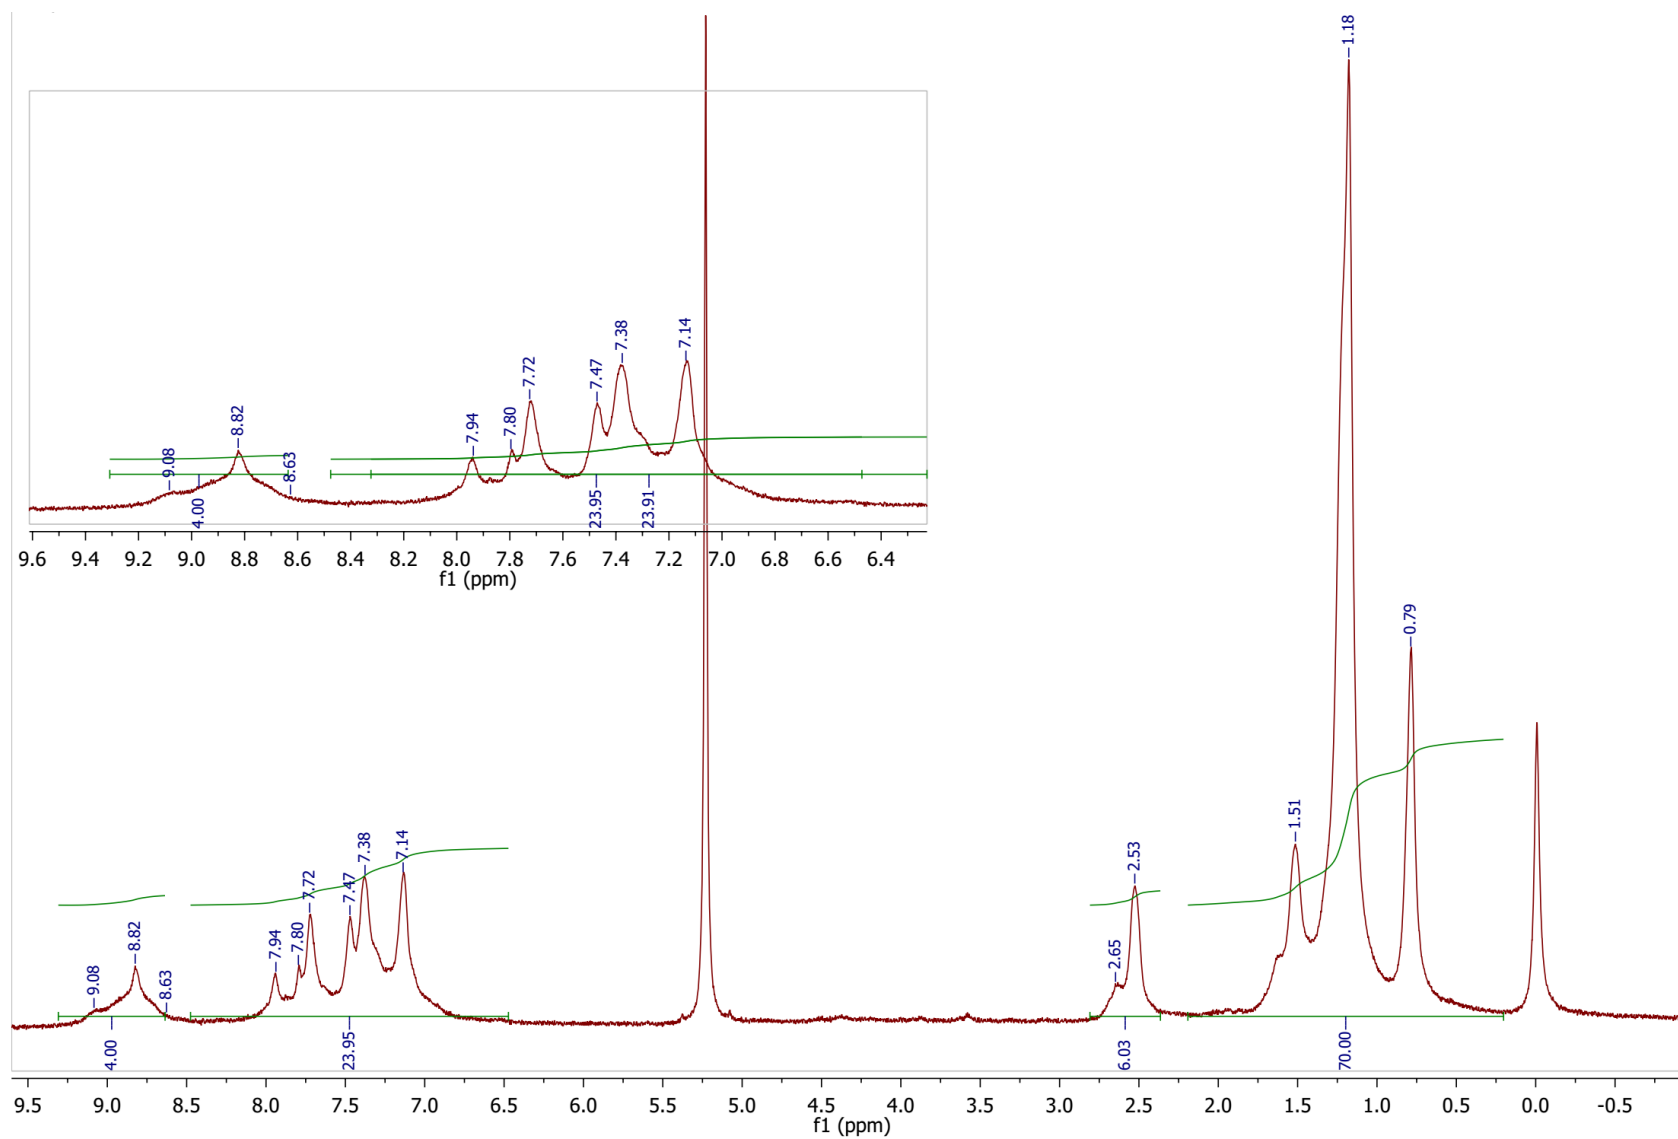

**Figure S19.**  $^1\text{H}$  NMR spectrum of **10b**

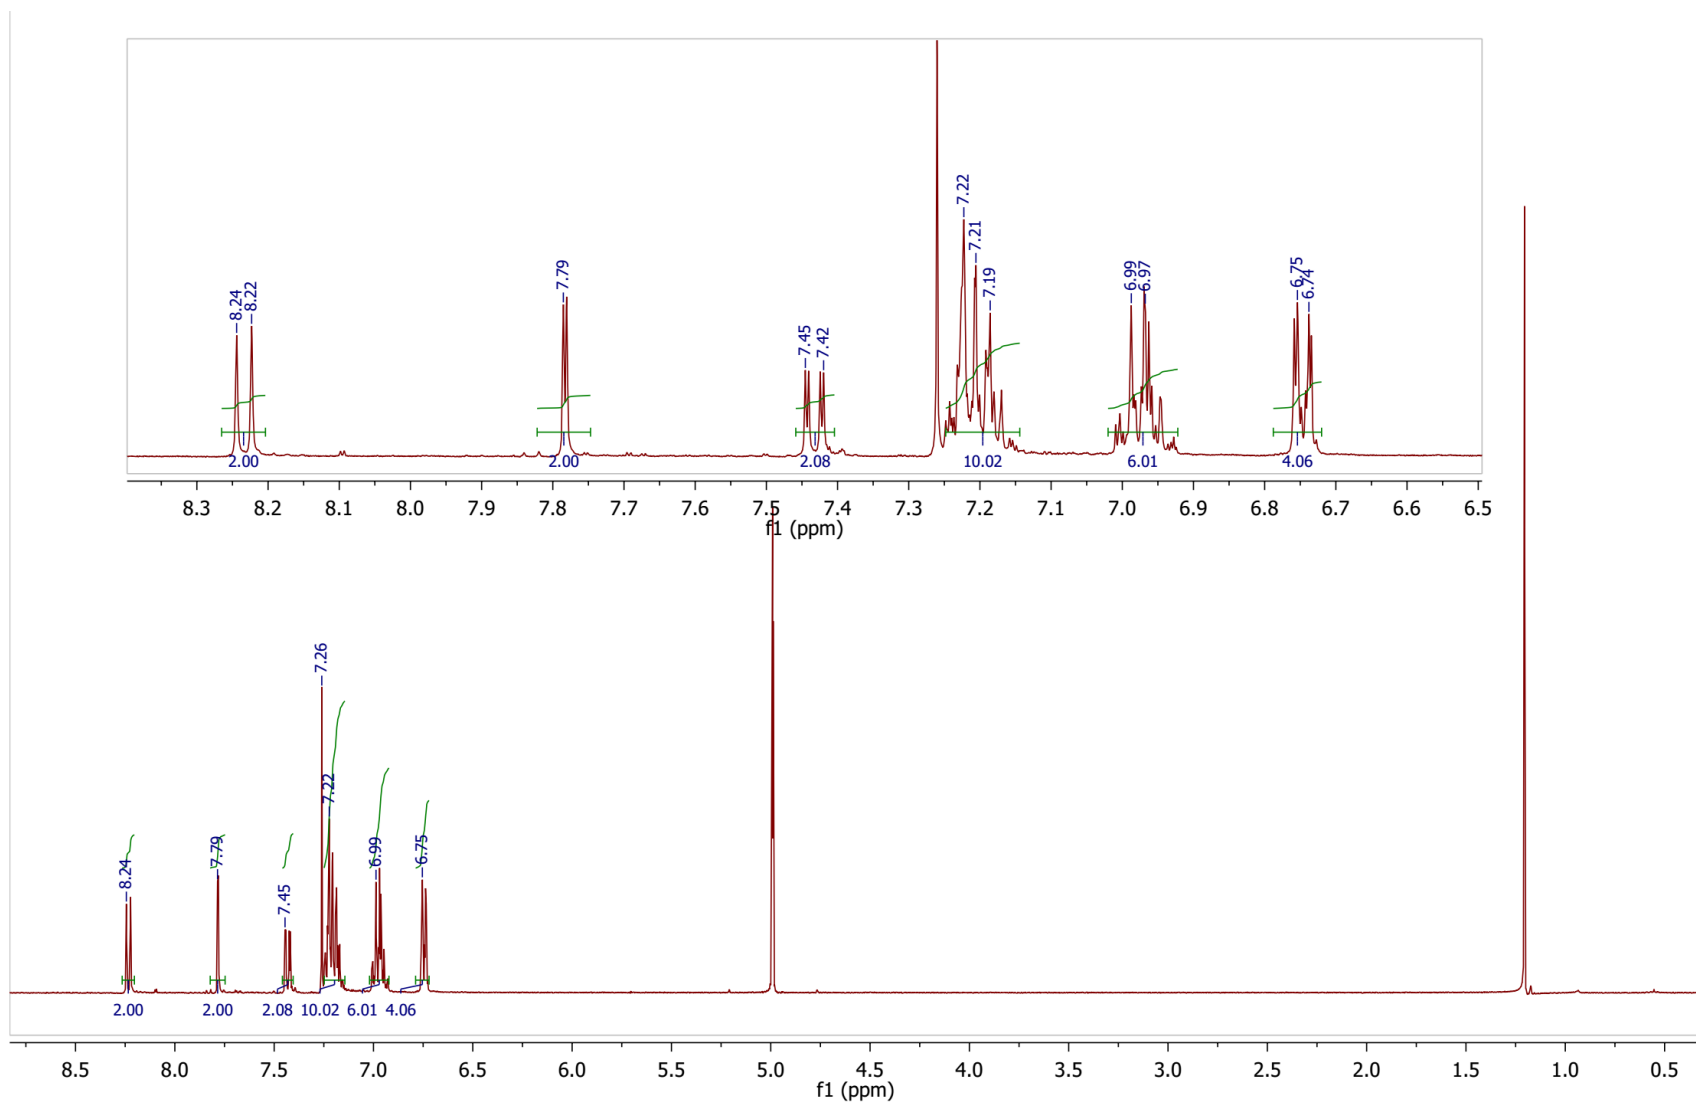

Figure S20.  $^1\text{H}$  NMR spectrum of 13a

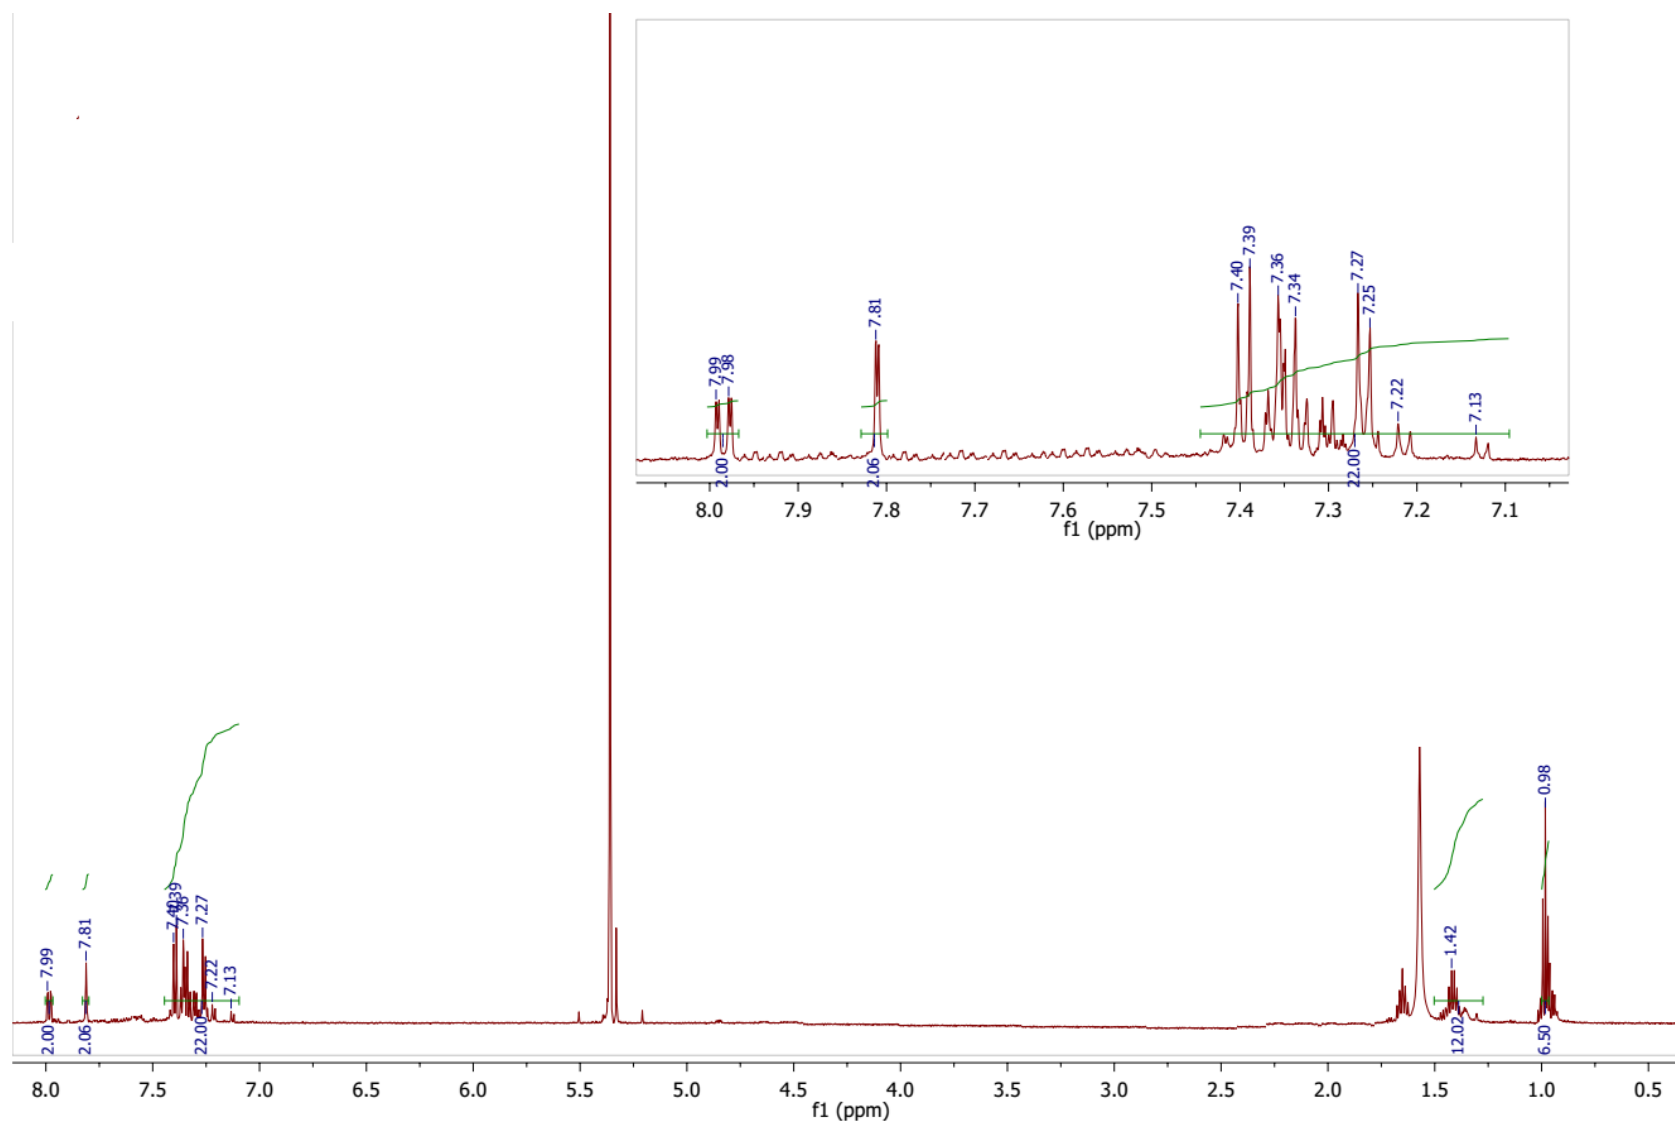

**Figure S21.**  $^1\text{H}$  NMR spectrum of **13b**

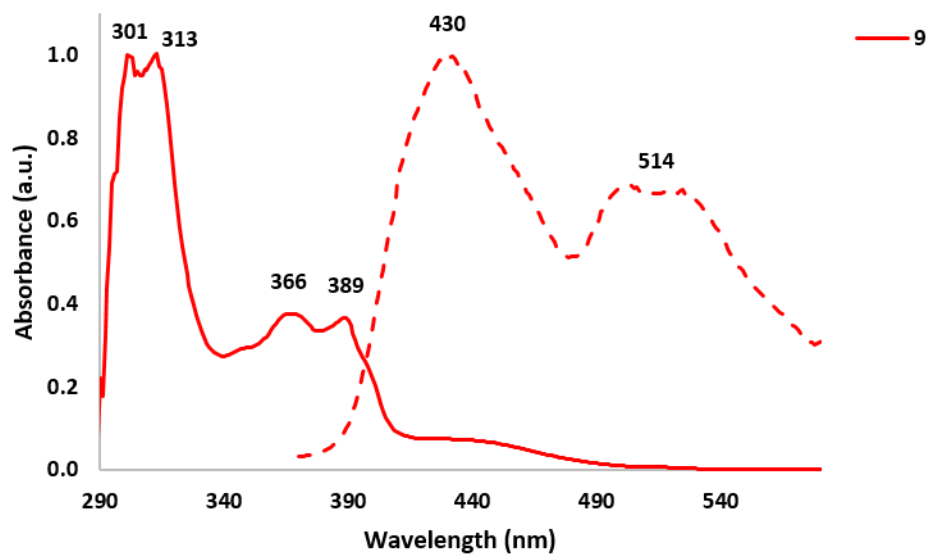

**Figure S22.** Normalized absorption and emission spectra for the pentaphene derivatives **9** in THF. The solid lines represent absorption spectra and the dotted lines correspond to emission spectra.

## II. Computational details

Table S1. Optimized structures and HOMO-LUMO frontier orbitals of DBPH and TBTP at the level of the B<sub>3</sub>LYP/6-31 G\* basis set with R = H (1a and 2-H) or Me (1-Me and 2-Me) instead of the alkyl groups for simplicity.

| No  | Optimized structure                                                                 | HOMO                                                                                 | LUMO                                                                                  |
|-----|-------------------------------------------------------------------------------------|--------------------------------------------------------------------------------------|---------------------------------------------------------------------------------------|
| 1a  | 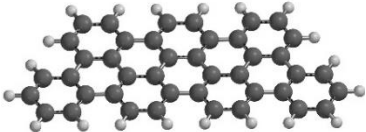   | 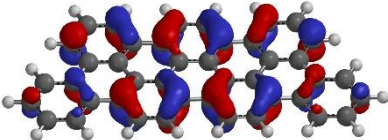   | 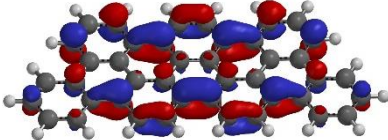   |
| 1Me | 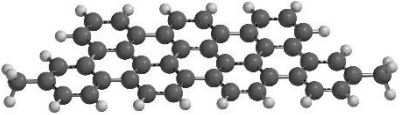   | 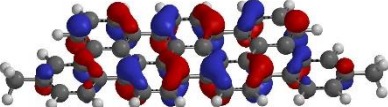   | 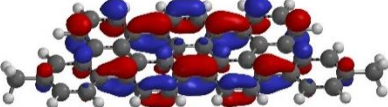   |
| 2H  | 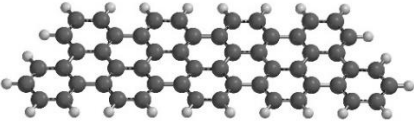  | 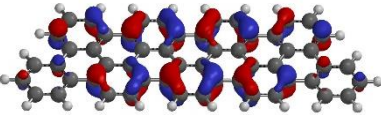  | 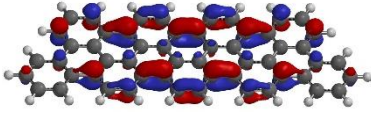  |
| 2Me | 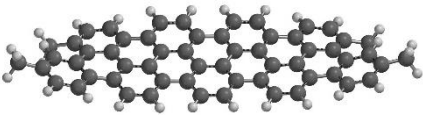 | 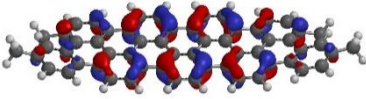 | 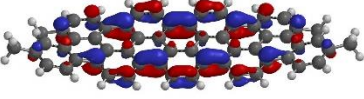 |
